# Supplementary material
Source: PubMed Central journal article supplement (PMC5638696)

# **Evaluation of Tumor Infiltrating Lymphocytes (TILs) in Lung Adenocarcinoma**

Guidelines for TILs assessment from “International  
Immuno-Oncology Biomarker Working Group”

Author: Gert van den Eynden<sup>1</sup>

<sup>1</sup>-GZA Hospitals and CORE Antwerp University, Antwerp, Belgium.

# Define area for TILs evaluation

TILs within the borders of the invasive tumors are evaluated

The invasive edge is included in the evaluation, but not reported separately

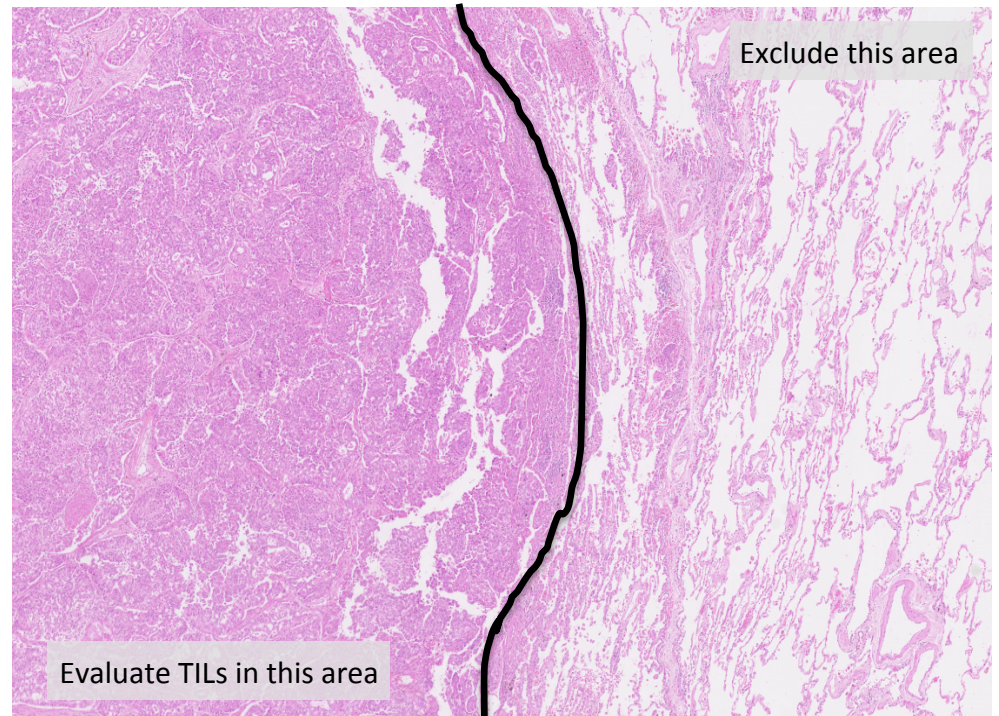

# Define area for TILs evaluation

TILs within the borders of the invasive tumors are evaluated

The invasive edge is included in the evaluation, but not reported separately

Immune infiltrates outside of the tumor borders are not included

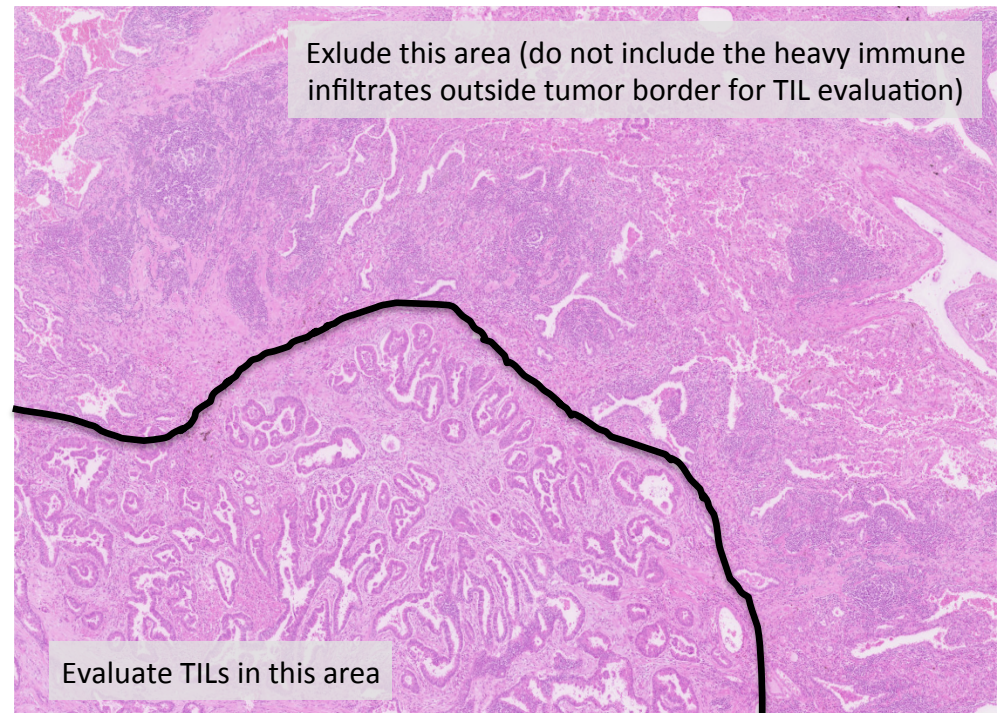



# Define area for TILs evaluation

TILs within the borders of the invasive tumors are evaluated

The invasive edge is included in the evaluation, but not reported separately

Immune infiltrates outside of the tumor borders are not included

Areas with pure intra-alveolar tumor cell nests ('aerogenic spread'; no desmoplastic reaction) or with pure lepidic growth pattern (no desmoplastic reaction) are not included

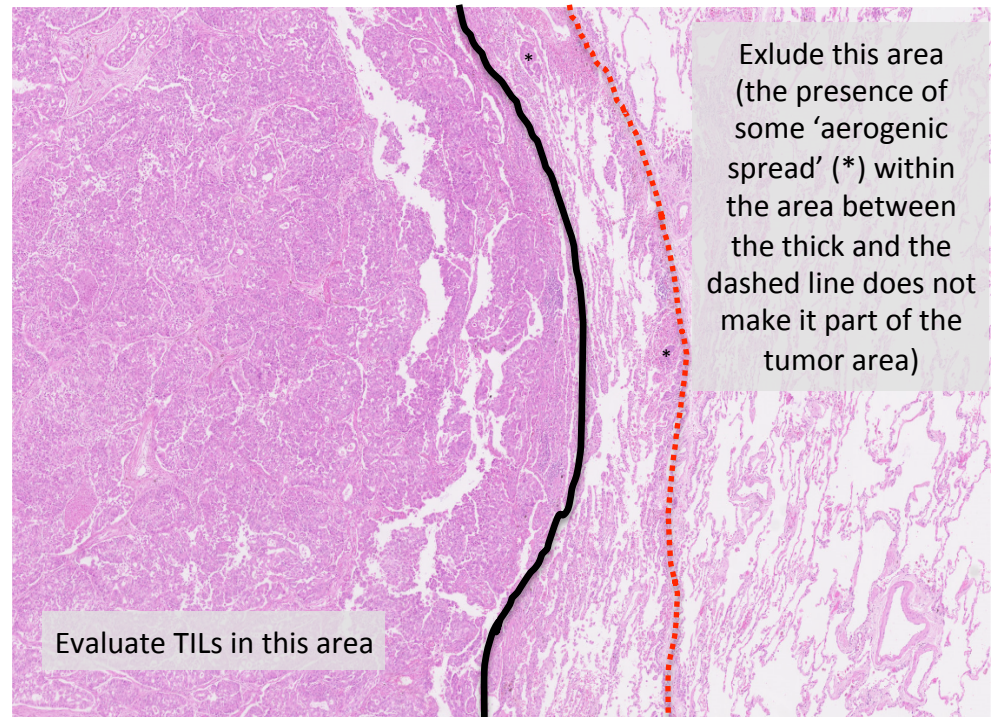



# Define area for TILs evaluation

TILs within the borders of the invasive tumors are evaluated

The invasive edge is included in the evaluation, but not reported separately

Immune infiltrates outside of the tumor borders are not included

Areas with pure intra-alveolar tumor cell nests ('aerogenic spread'; no desmoplastic reaction) or with pure lepidic growth pattern (no desmoplastic reaction) are not included

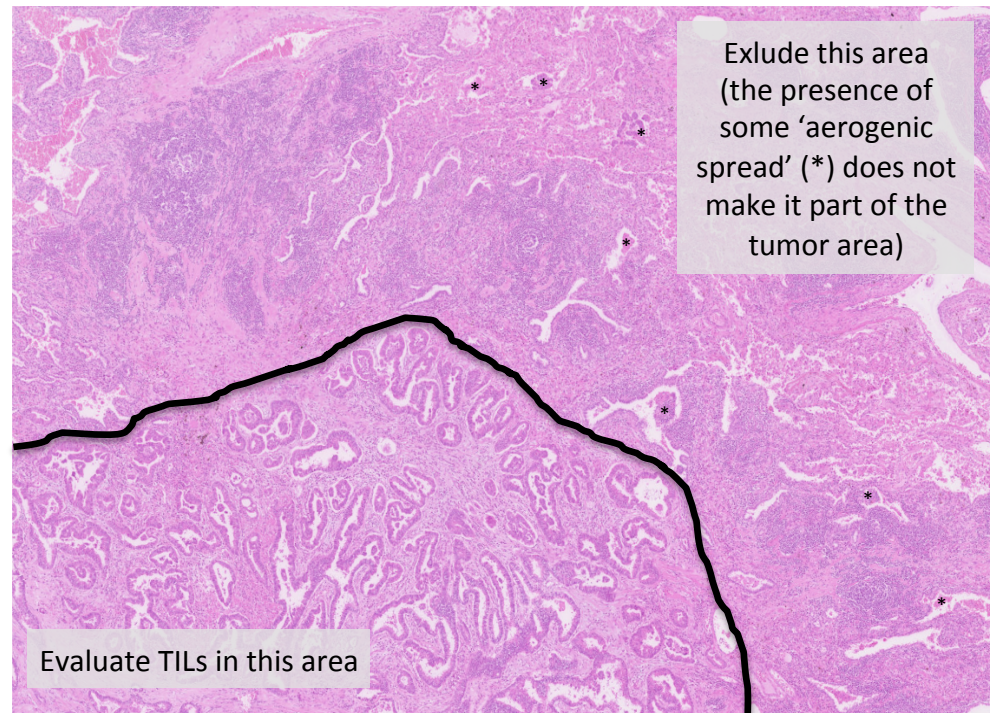

# Define area for TILs evaluation

Include TILs evaluation in stroma pertaining to fibro-vascular cores of papillary structures

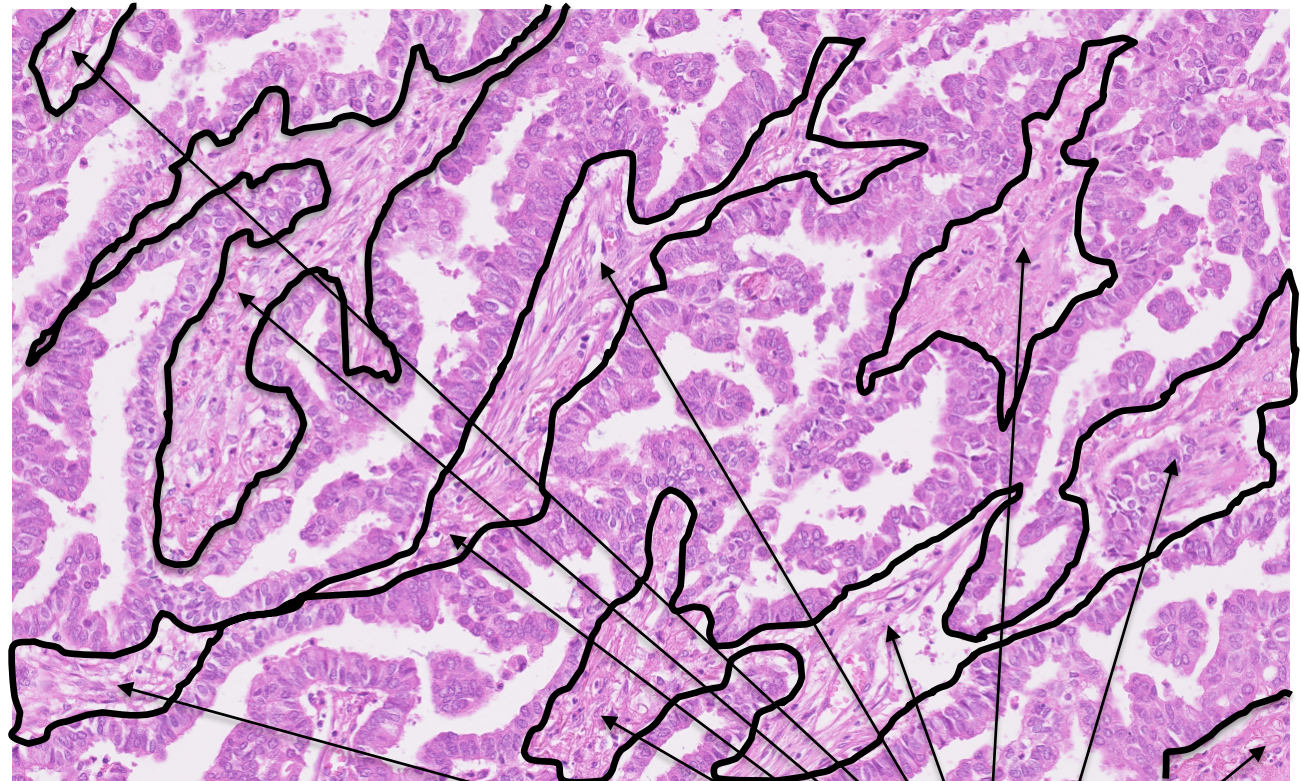

Include TILs in this area  
= stromal TILs



# Define area for TILs evaluation

Include TILs evaluation in stroma pertaining to fibro-vascular cores of papillary structures

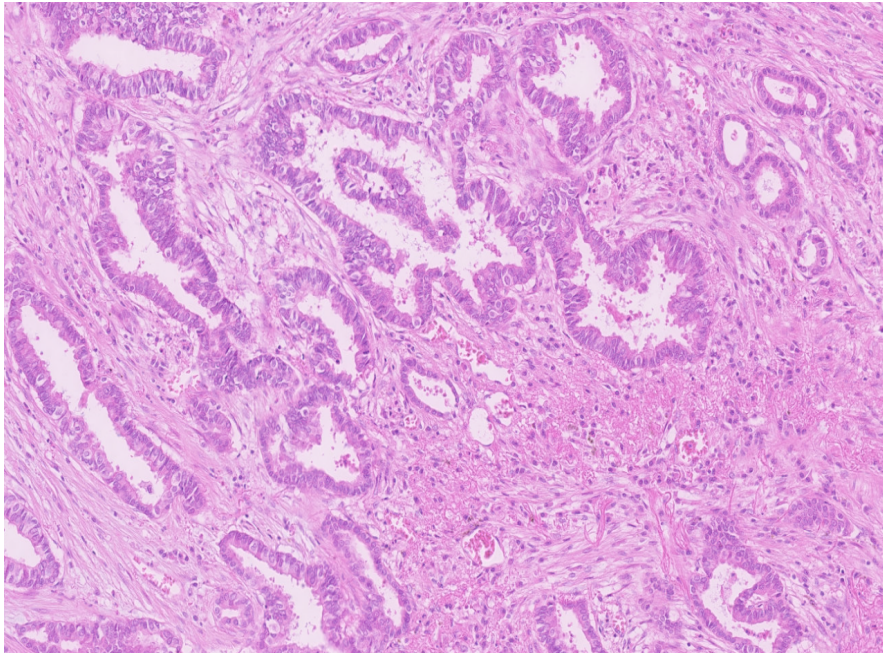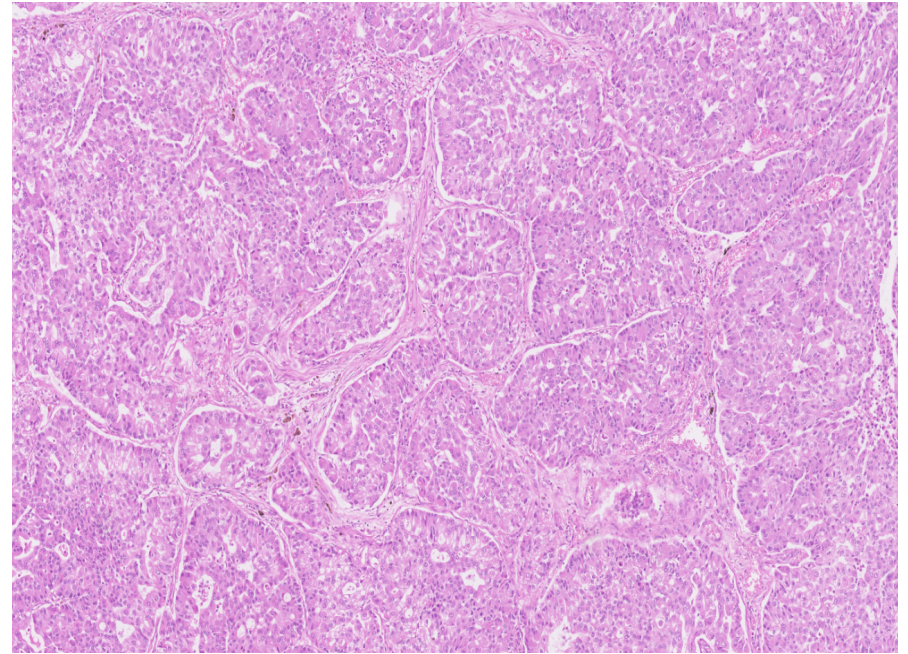



# Define area for TILs evaluation

Include TILs evaluation in stroma pertaining to fibro-vascular cores of papillary structures

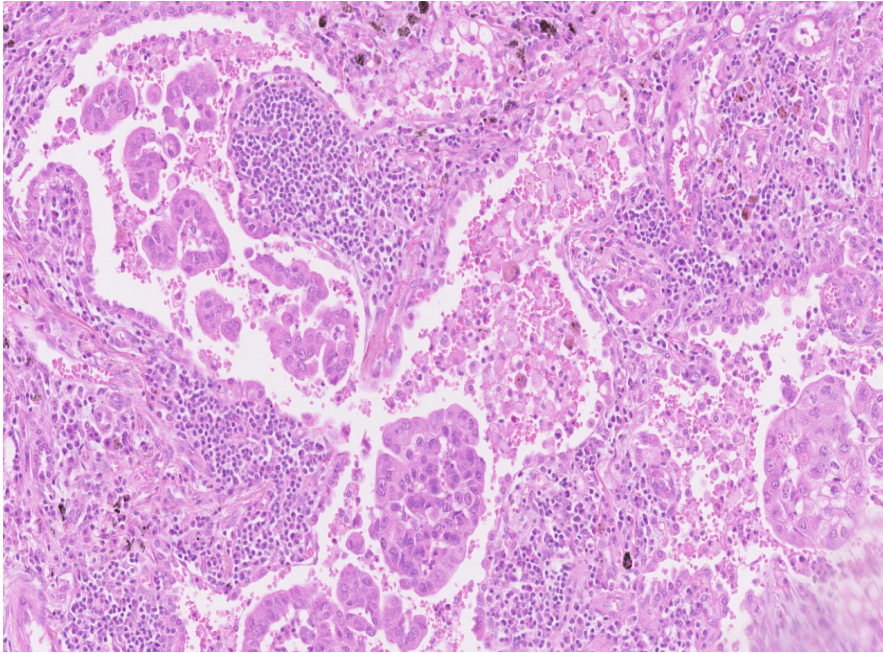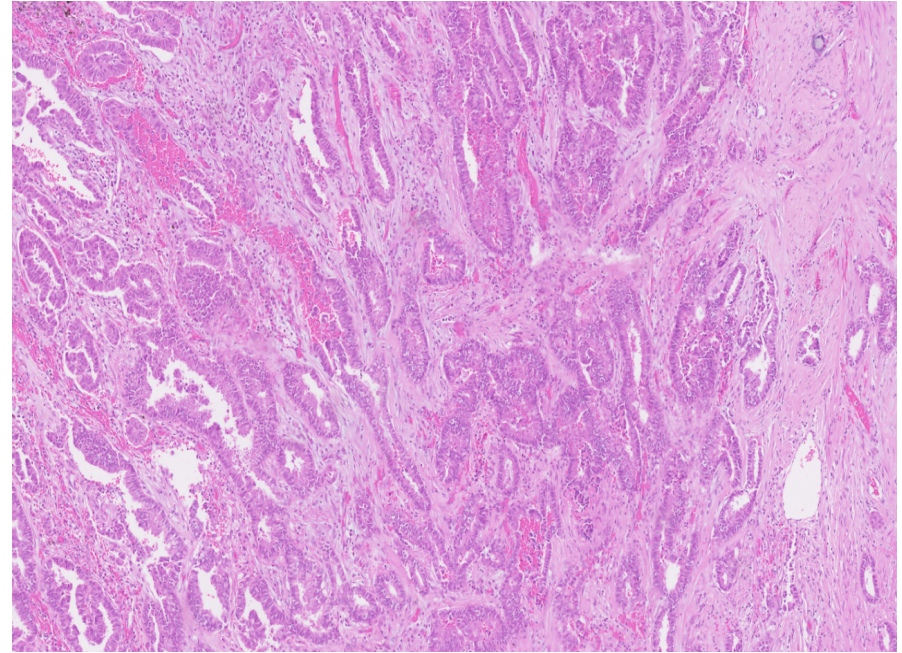

# Define area for TILs evaluation

In cases with (partial) lepidic or intra-alveolar growth of the carcinoma, do not include inflammatory cells in intraalveolar spaces (often mixed with alveolar macrophages)

Do not include this area

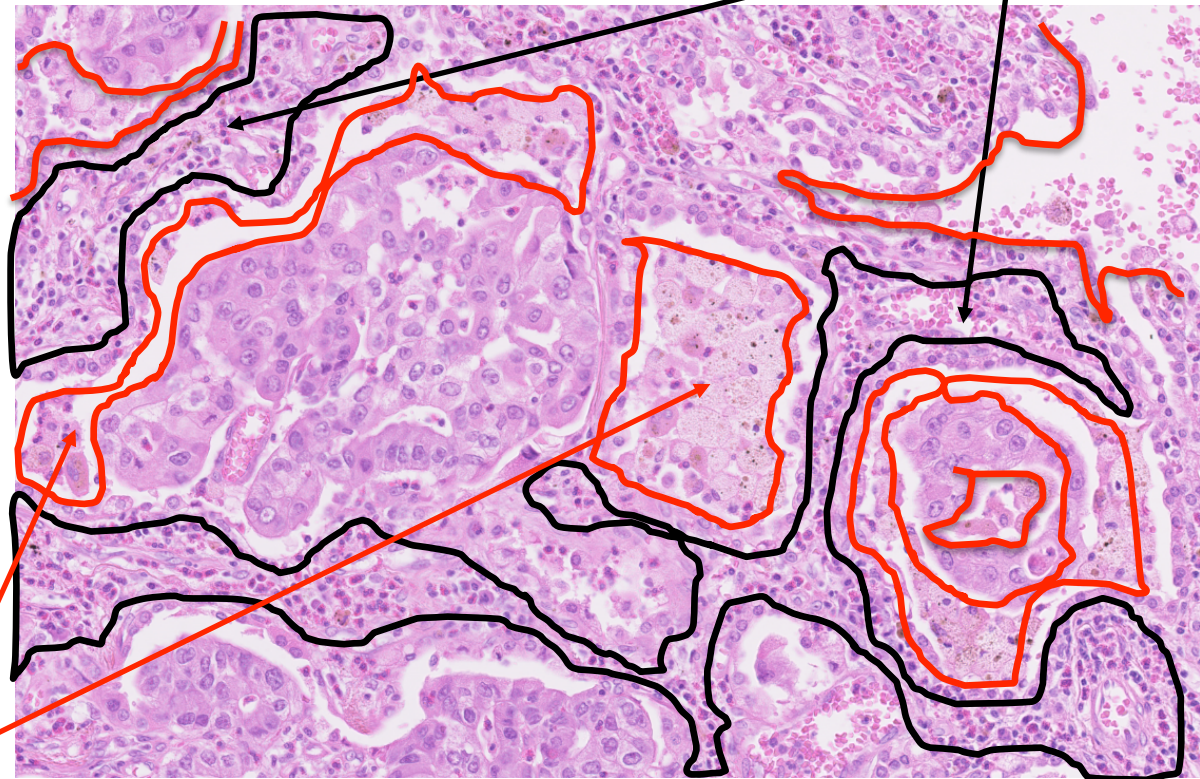

Include this area



# Define area for TILs evaluation

- Areas of necrosis or fibrosis are not included in the evaluation

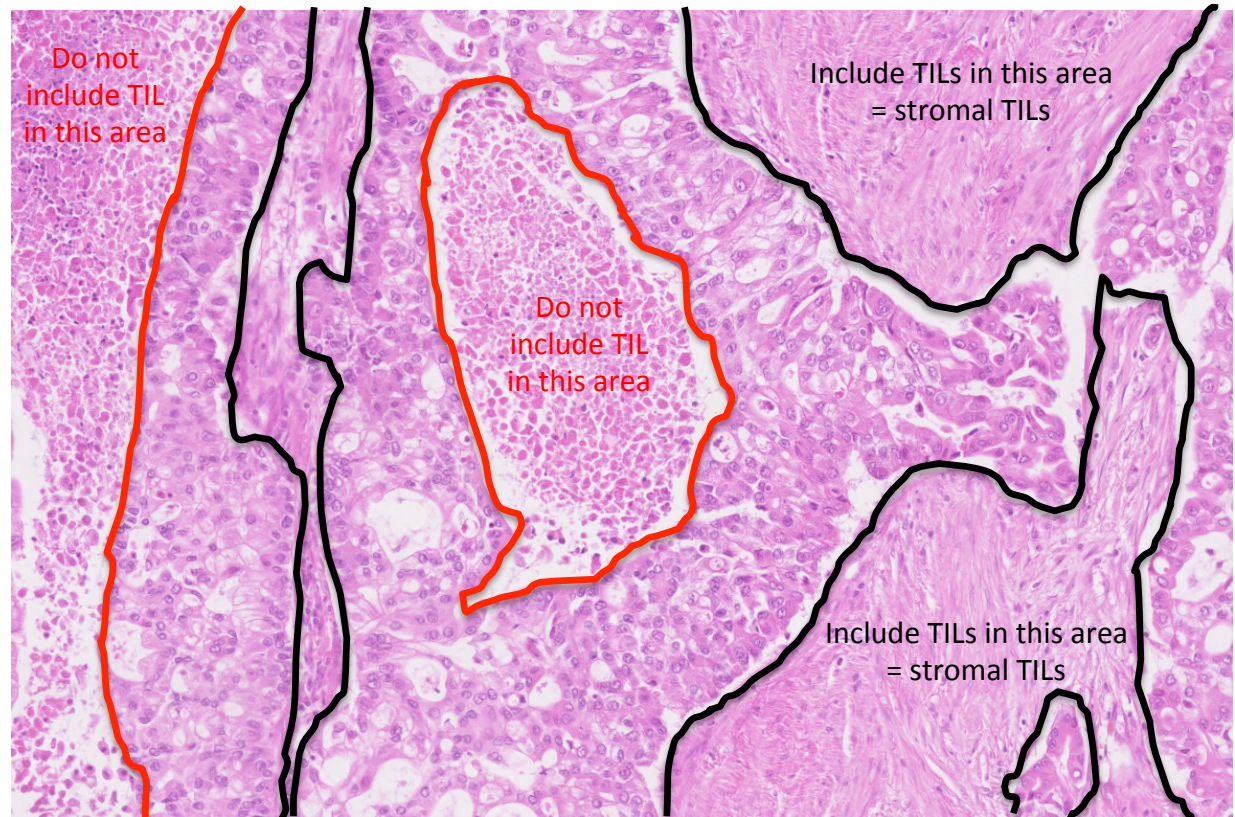



# Determine the localization of inflammatory infiltrate

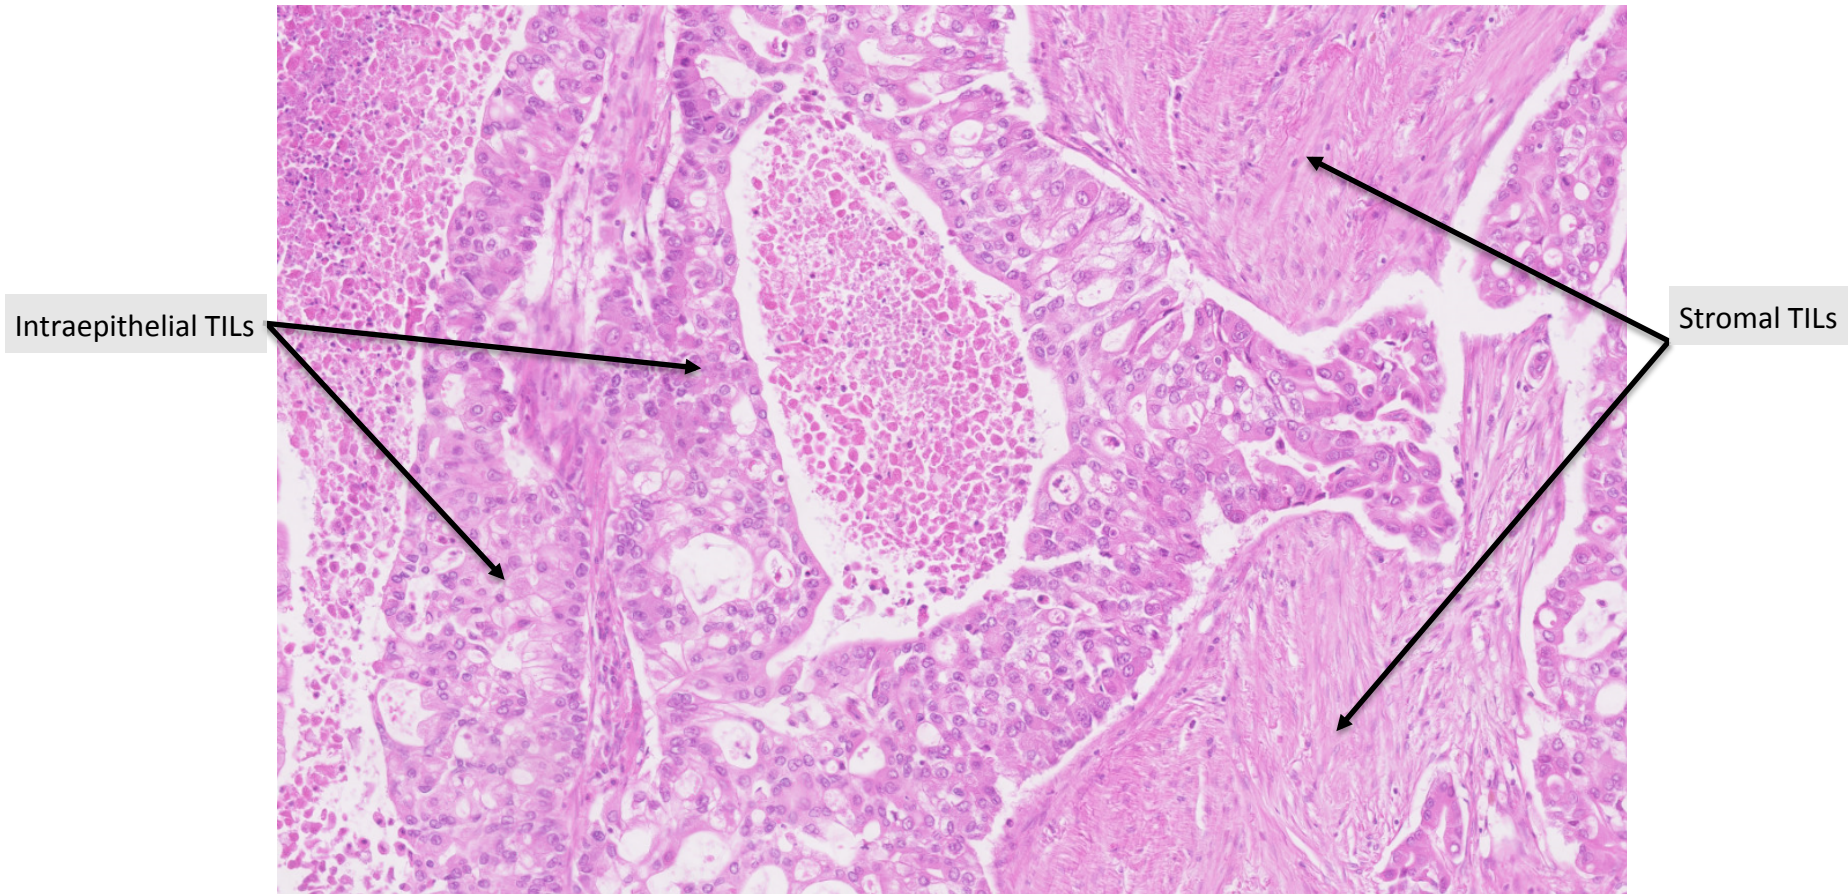

# Determine type of inflammatory infiltrate

Include only mononuclear infiltrate  
(lymphocytes & plasma cells)

Do not include granulocytic infiltrate  
in areas of tumor necrosis

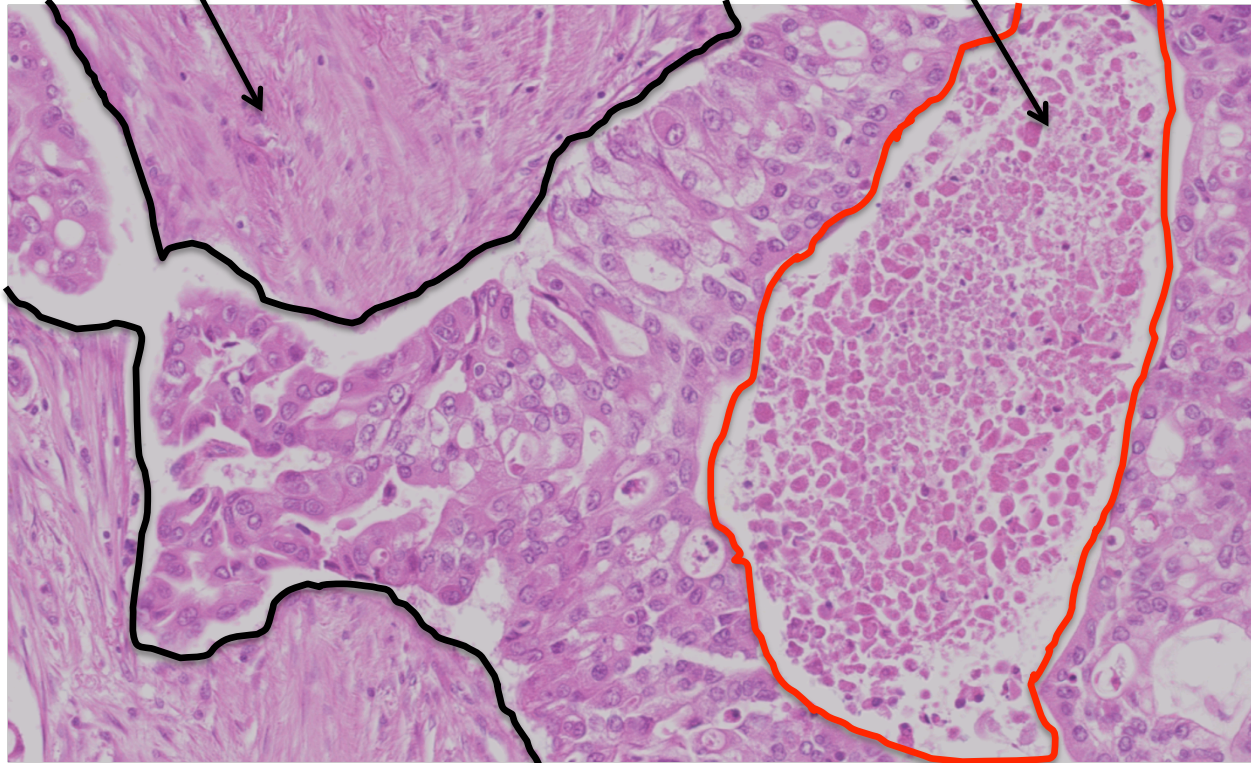



# Determine type of inflammatory infiltrate

Include only mononuclear infiltrate  
(lymphocytes & plasma cells)

Do not include granulocytic infiltrate  
in areas of tumor necrosis

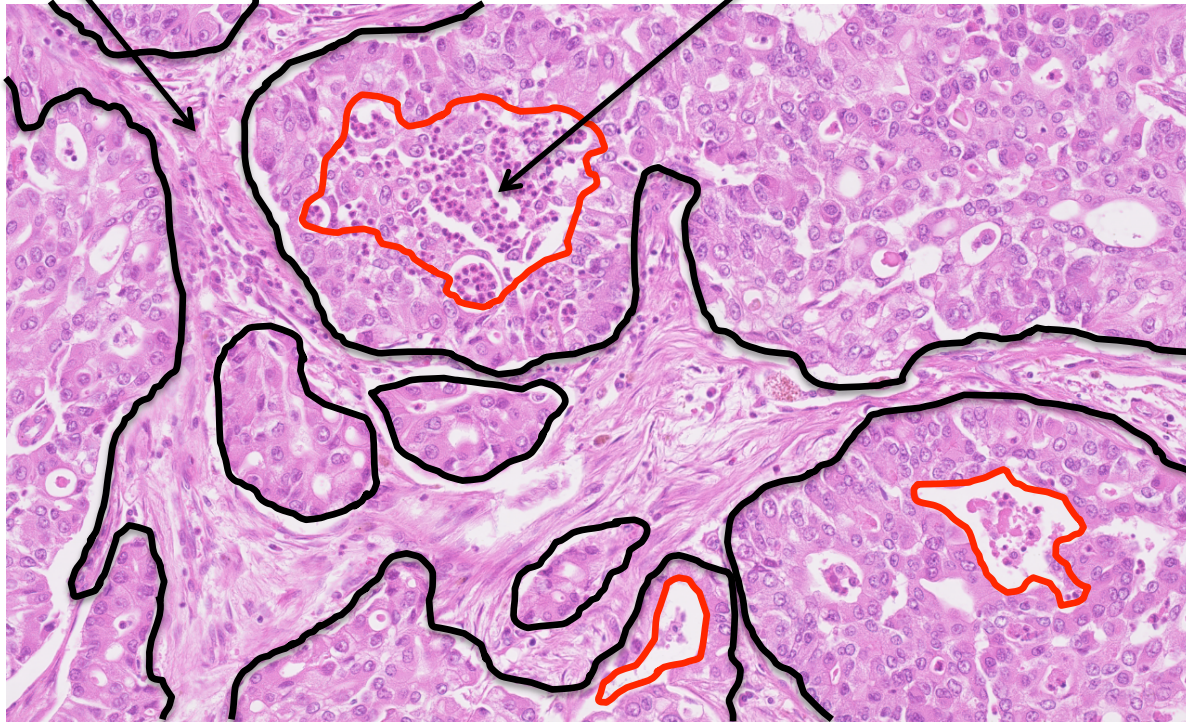

Supplement: NIHMS883270-supplement-Supplemental_Data_File_2.pdf [file NIHMS883270-supplement-Supplemental_Data_File_2.pdf]
