# Supplementary material
Source: PubMed Central journal article supplement (PMC5638696)

# **Evaluation of Tumor Infiltrating Lymphocytes (TILs) in High-grade Serous Ovarian Carcinoma**

Guidelines for TILs assessment from the “International  
Immuno-Oncology Biomarker Working Group”

Authors: Giancarlo Pruneri and Andrea Vingaini  
European Institute of Oncology and University of Milan, Italy.

# Define area for TILs evaluation

- TILs within the borders of the invasive tumors are evaluated
- The invasive edge is included in the evaluation, but not reported separately
- Immune infiltrates outside of the tumor borders are not included

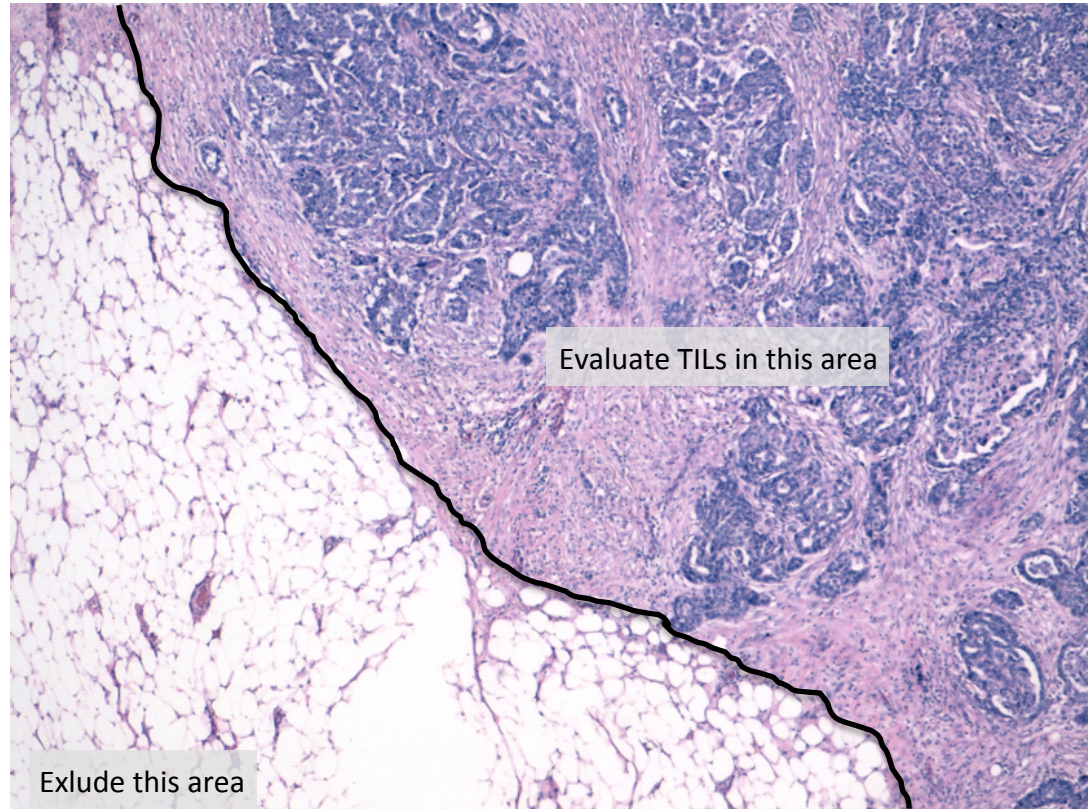

# Define area for TILs evaluation

- TILs within the borders of the invasive tumors are evaluated
- The invasive edge is included in the evaluation
- Immune infiltrates outside of the tumor borders are not included

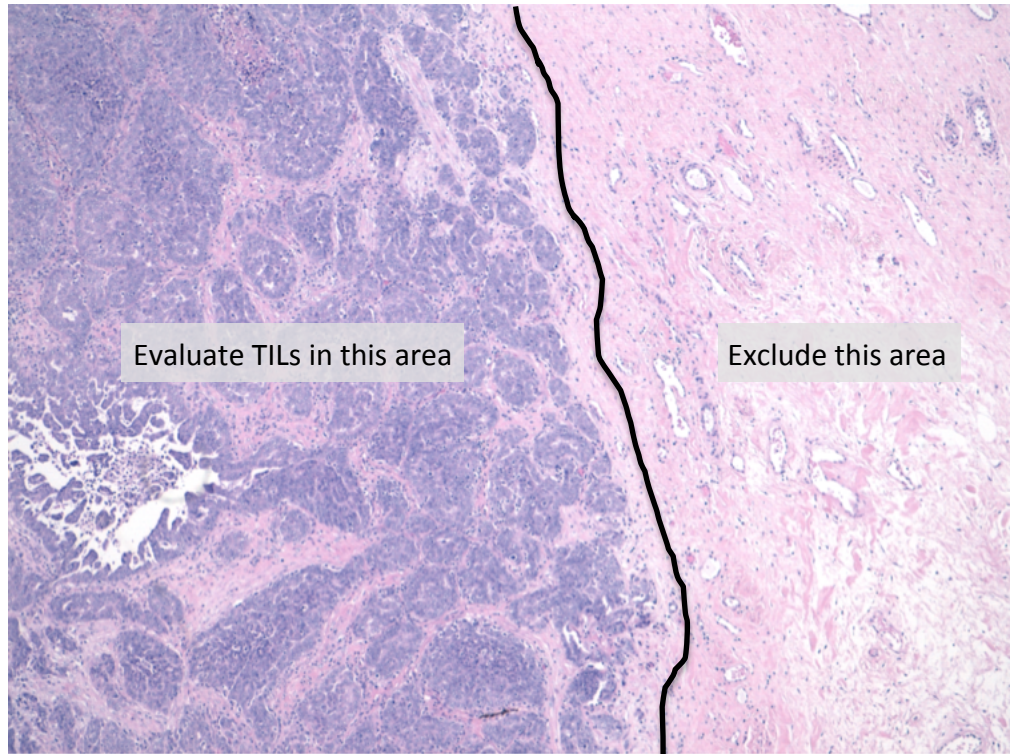

# Define area for TILs evaluation

Include TILs evaluation in stroma pertaining to fibro-vascular cores of papillary structures

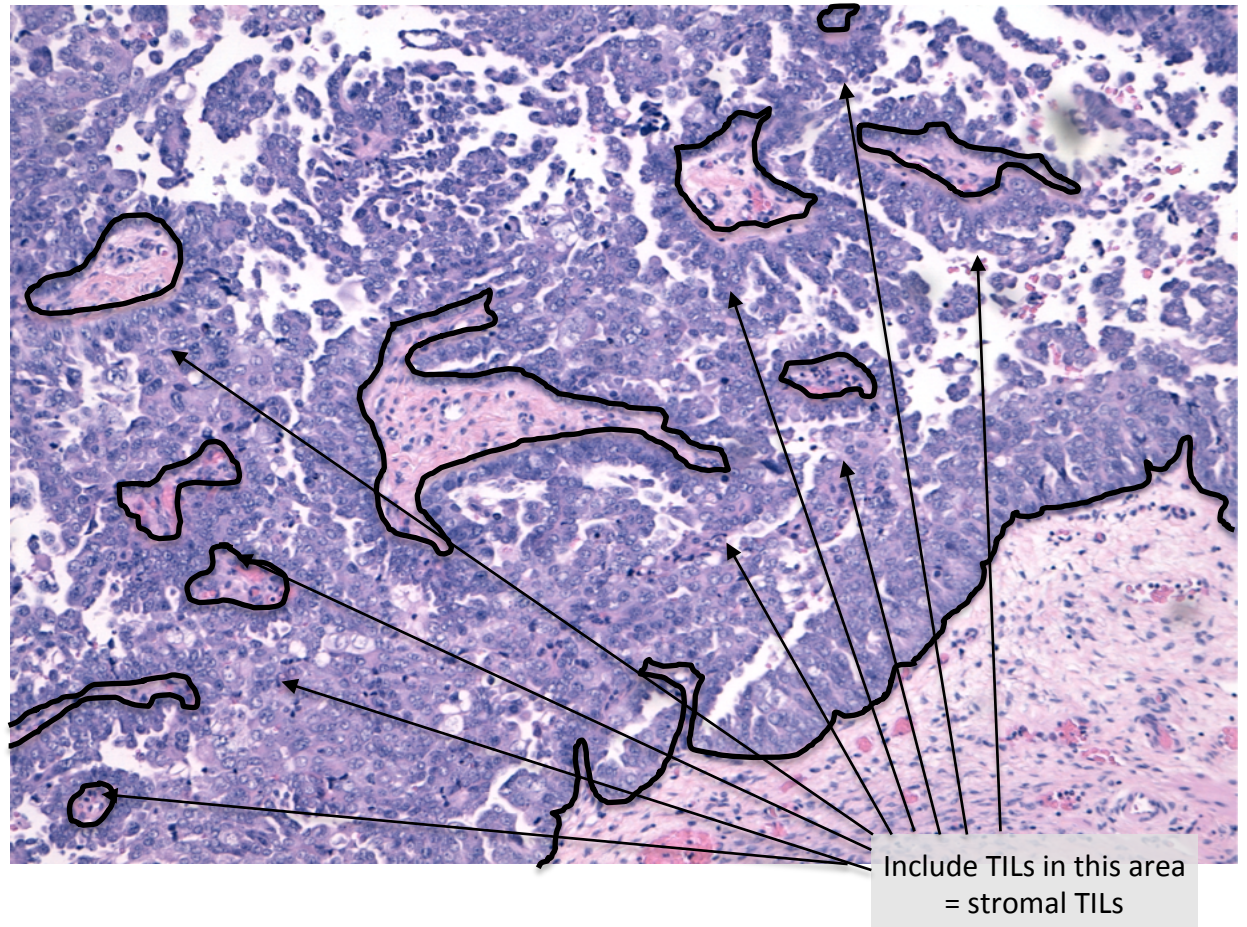

# Define area for TILs evaluation

Include TILs evaluation in stroma pertaining to fibro-vascular cores of papillary structures

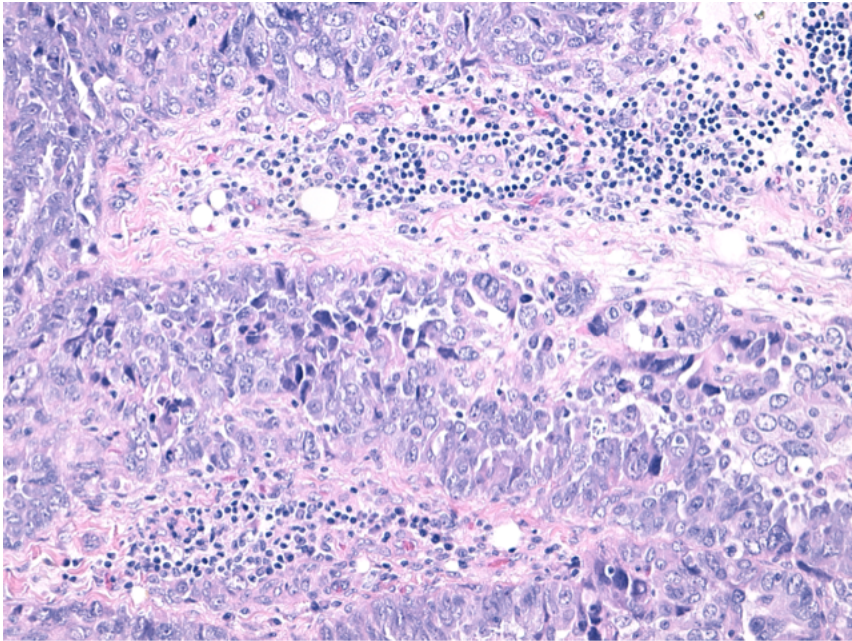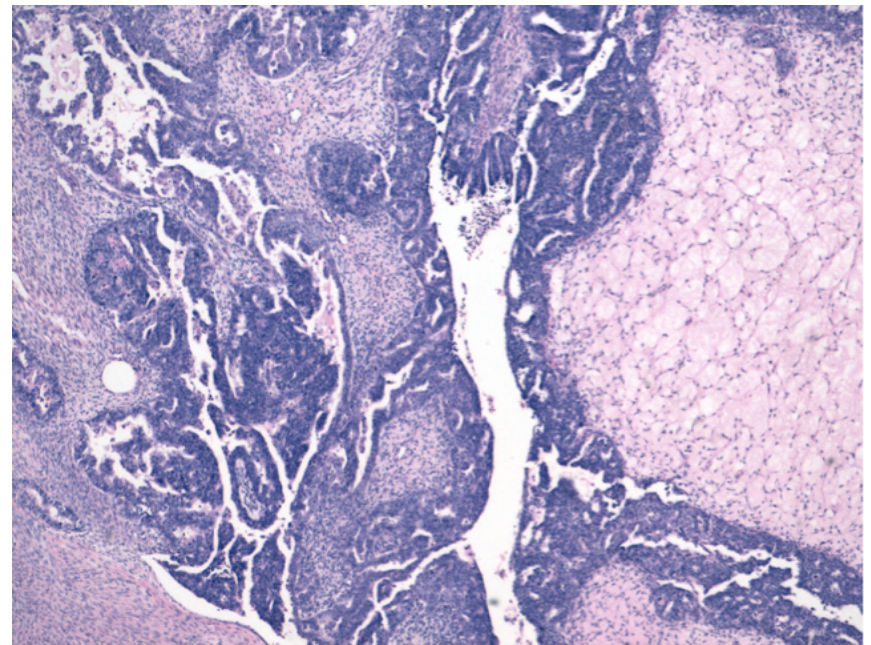

# Define area for TILs evaluation

Include TILs evaluation in stroma pertaining to fibro-vascular cores of papillary structures

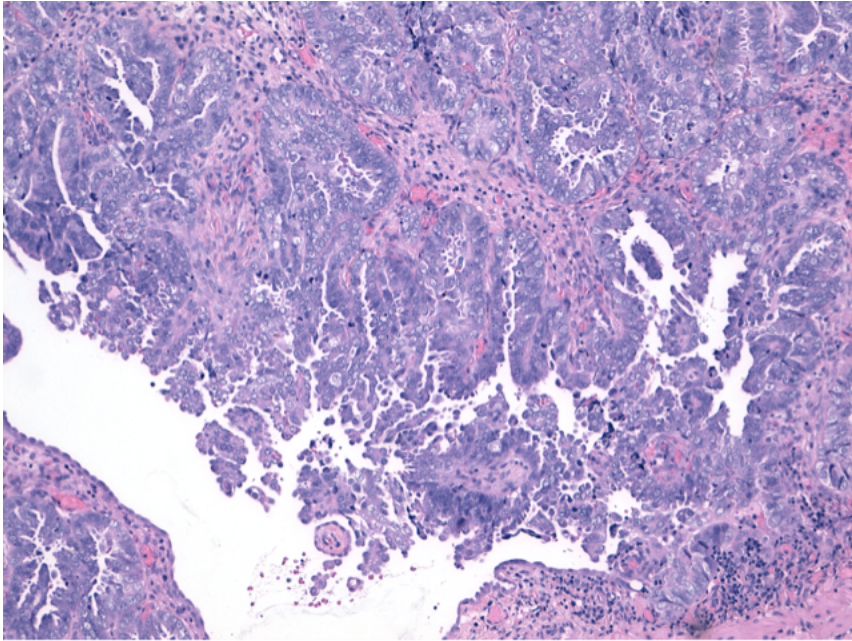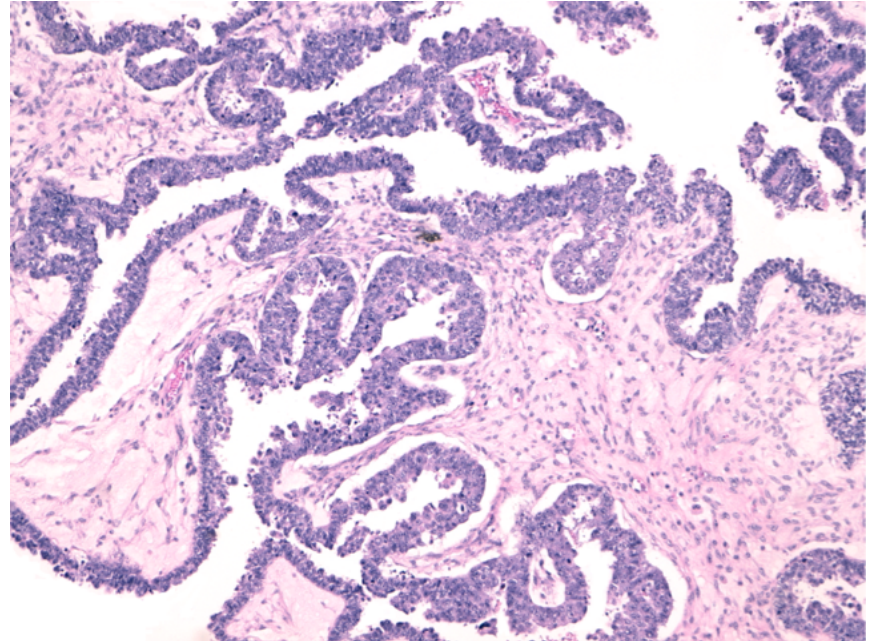

# Define area for TILs evaluation

In case of ovarian or peritoneal superficial tumor localizations, evaluate TILs in connective tissue just beneath the epithelial layer within 1mm.

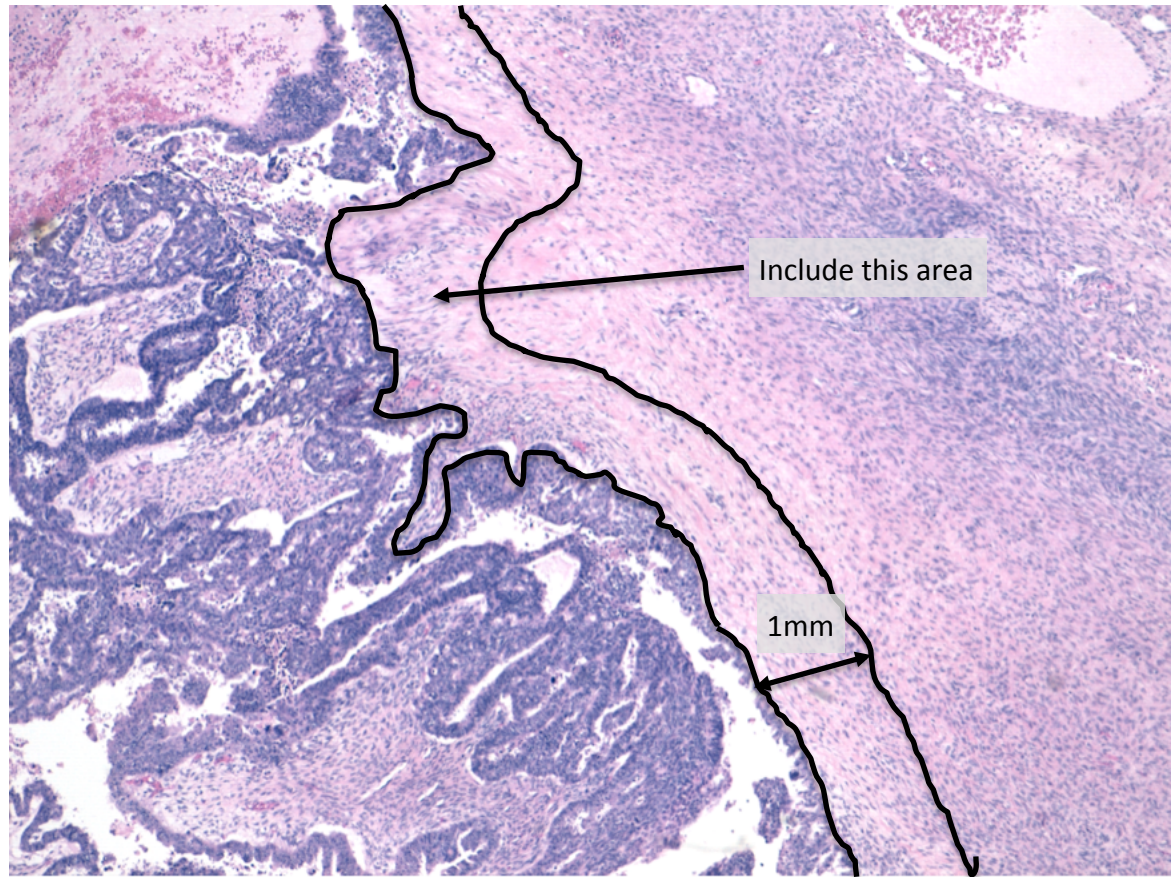

# Define area for TILs evaluation

Areas of necrosis or fibrosis are not included in the evaluation

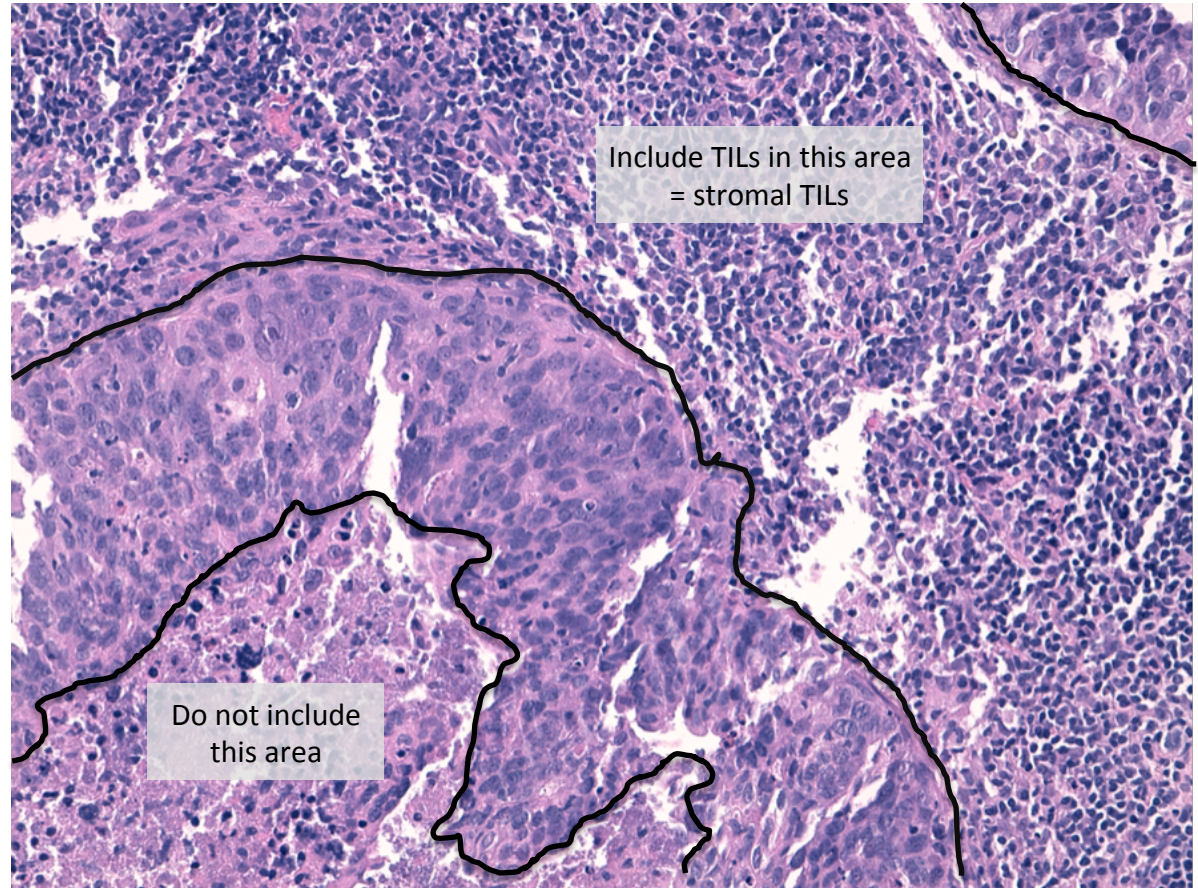



# Determine the localization of inflammatory infiltrate

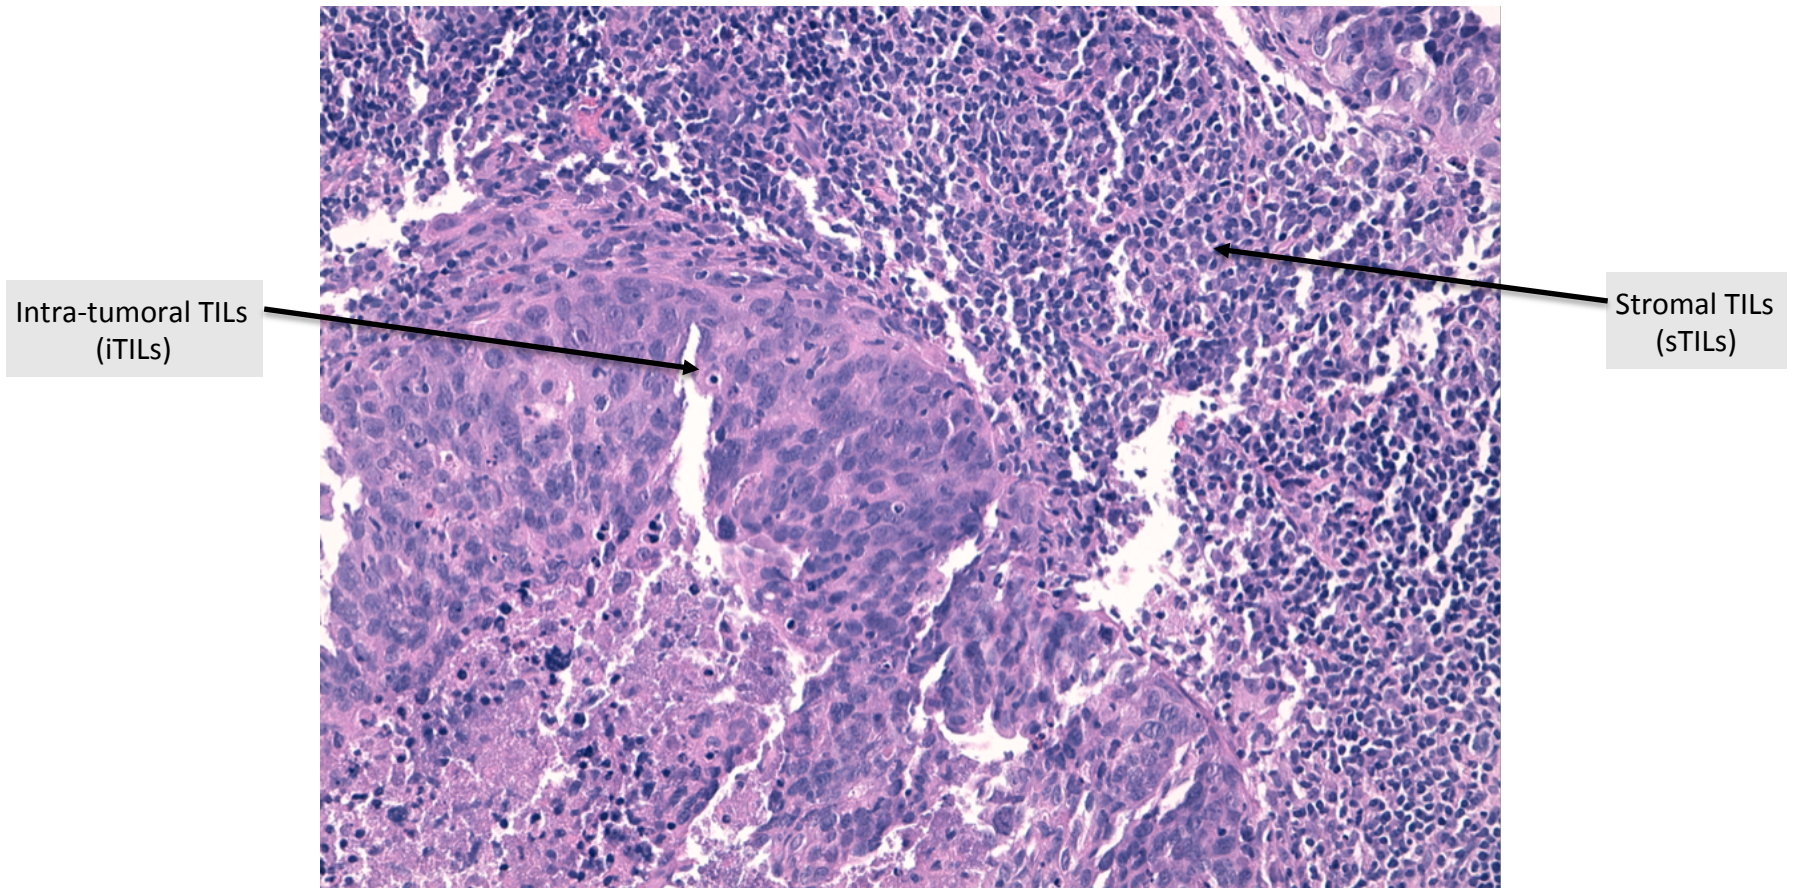

# Determine type of inflammatory infiltrate

Include only mononuclear infiltrate  
(lymphocytes & plasma cells)

Do not include granulocytic infiltrate  
in areas of tumor necrosis

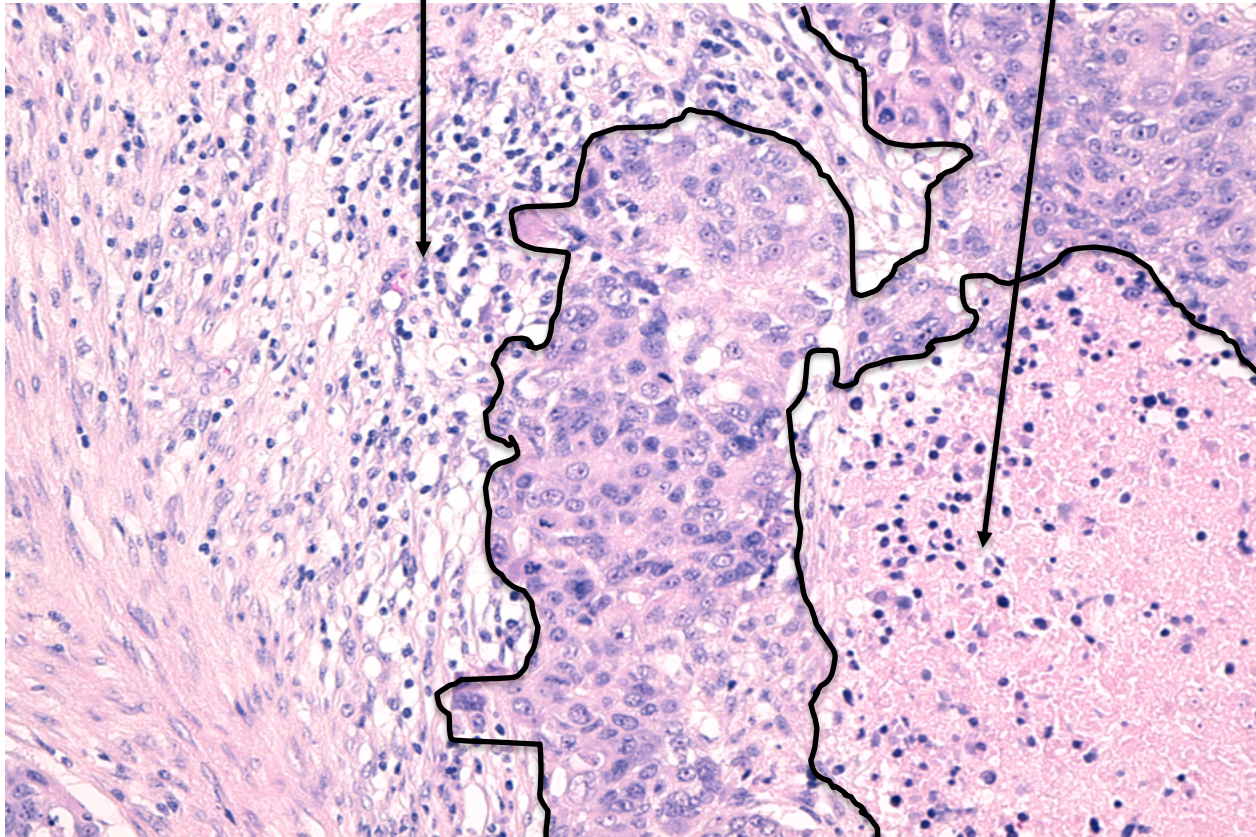

Supplement: NIHMS883270-supplement-Supplemental_Data_File_5.pdf [file NIHMS883270-supplement-Supplemental_Data_File_5.pdf]
