# Supplementary material
Source: PubMed Central journal article supplement (PMC5638696)
Supplement: NIHMS883270-supplement-Supplemental_Data_File_1.pdf [file NIHMS883270-supplement-Supplemental_Data_File_1.pdf]

# **Evaluation of Tumor Infiltrating Lymphocytes (TILs) in Melanoma**

Guidelines for TILs assessment from the “International  
Immuno-Oncology Biomarker Working Group”

Authors: Paula Gonzalez Ericsson<sup>1</sup>, Melinda Sanders<sup>1</sup> and Valeria Estrada<sup>2</sup>

1- Vanderbilt University, Nashville-TN. 2- University of California, San Diego-CA

# Define area for TILs evaluation

TILs within the border of the invasive tumor are evaluated. The TILs along the invasive edge are included in the evaluation. Immune infiltrates outside of the tumor borders are not included.

Separately evaluating the central tumor, invasive margins and peri-tumor regions may of interest in the research setting.

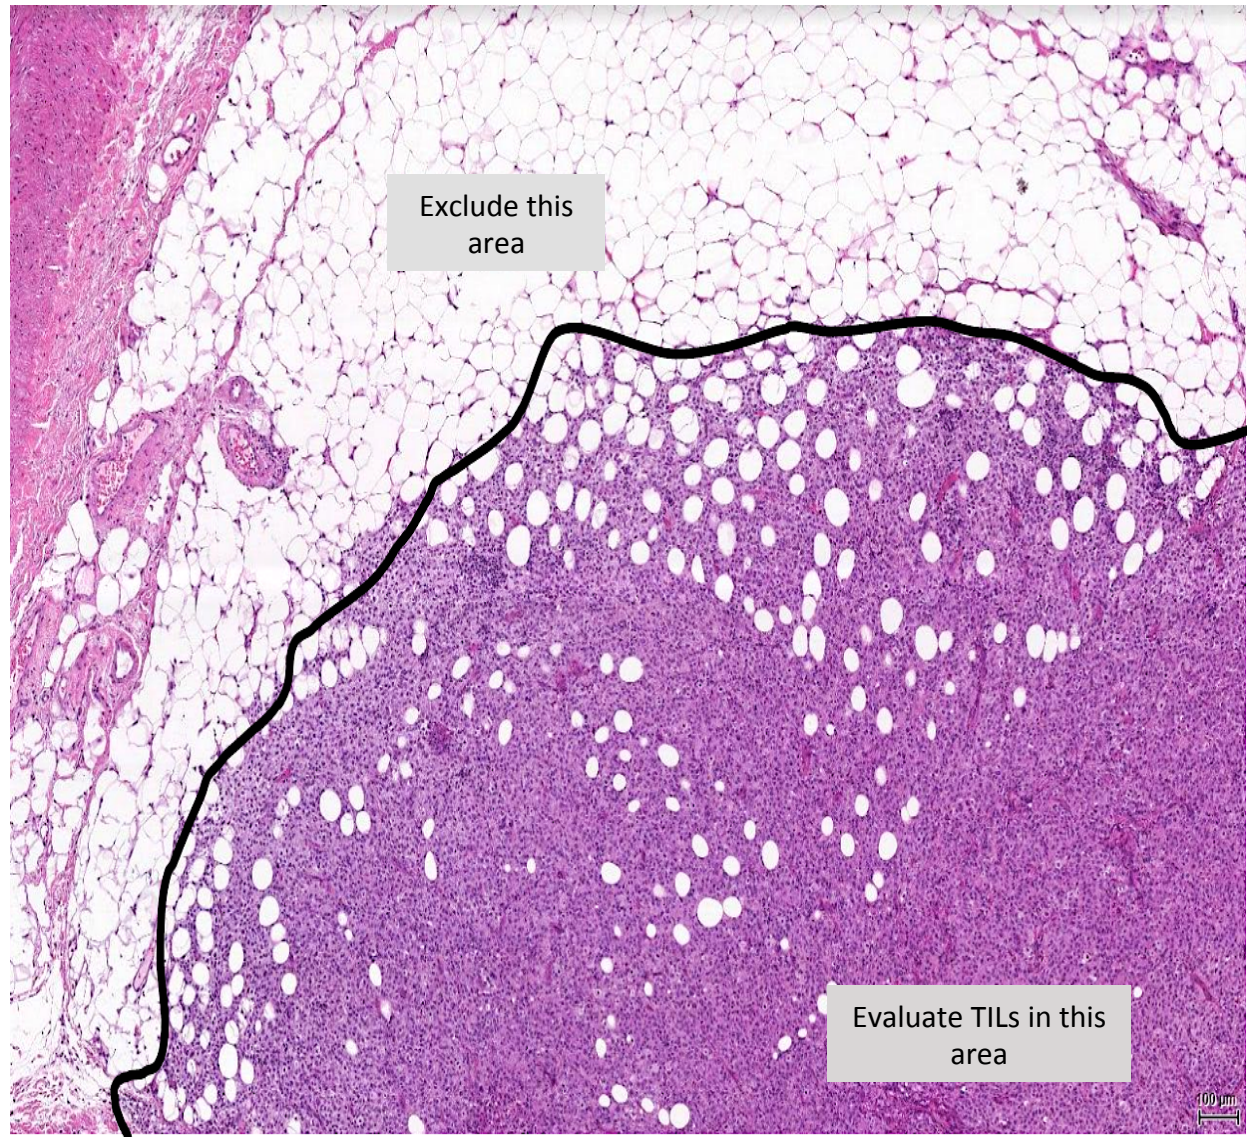



# Define area for TILs evaluation

TILs within the border of the invasive tumor are evaluated. The TILs along the invasive edge are included in the evaluation. Immune infiltrates outside of the tumor borders are not included.

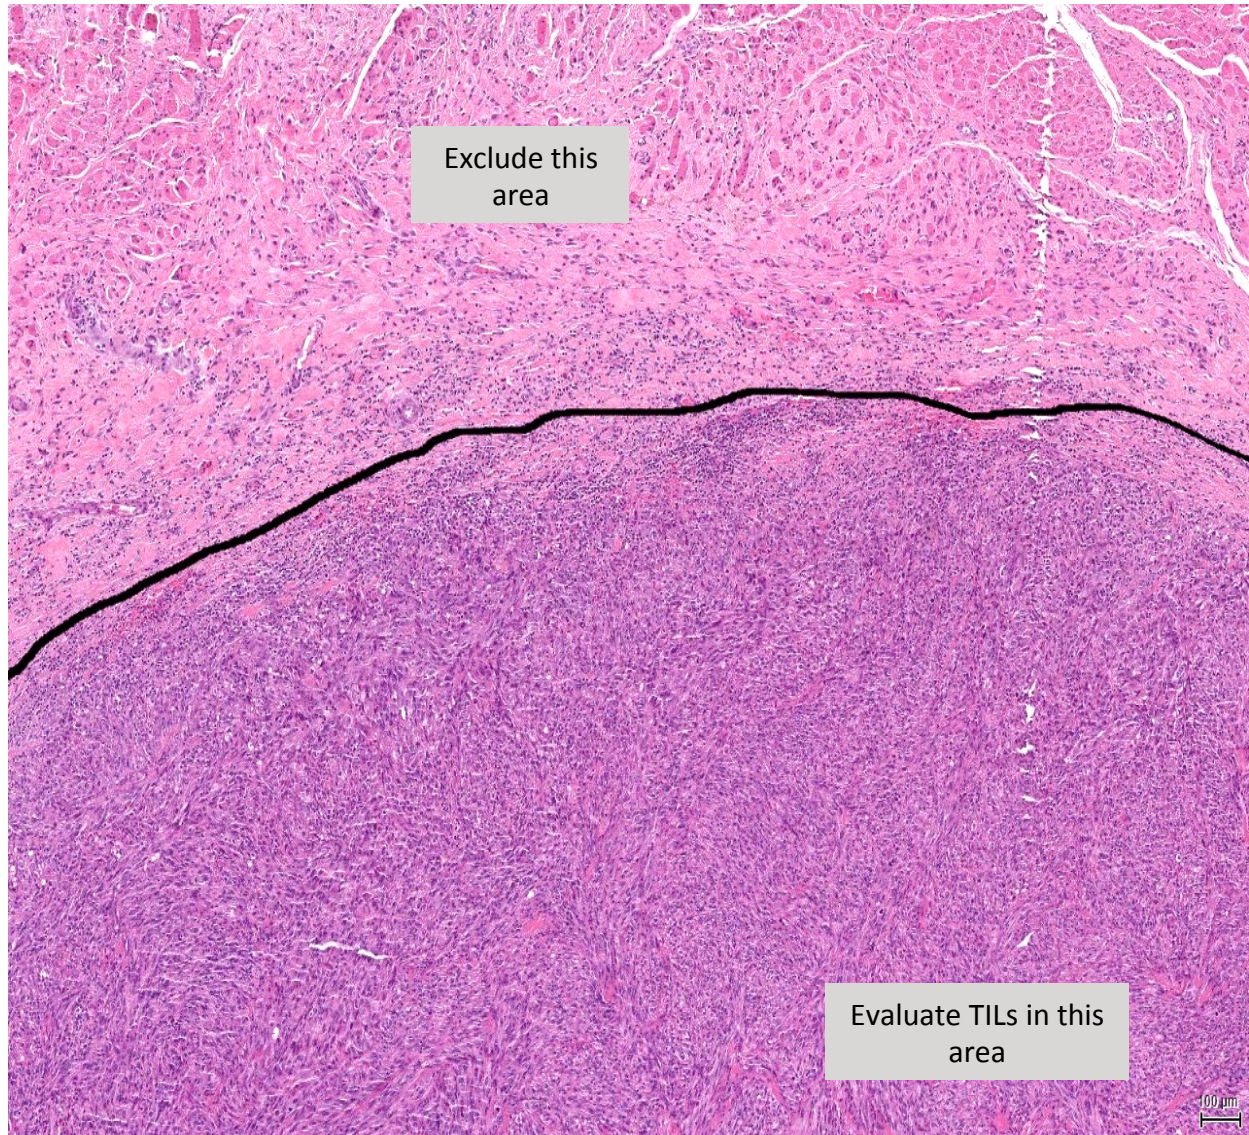



# Define area for TILs evaluation

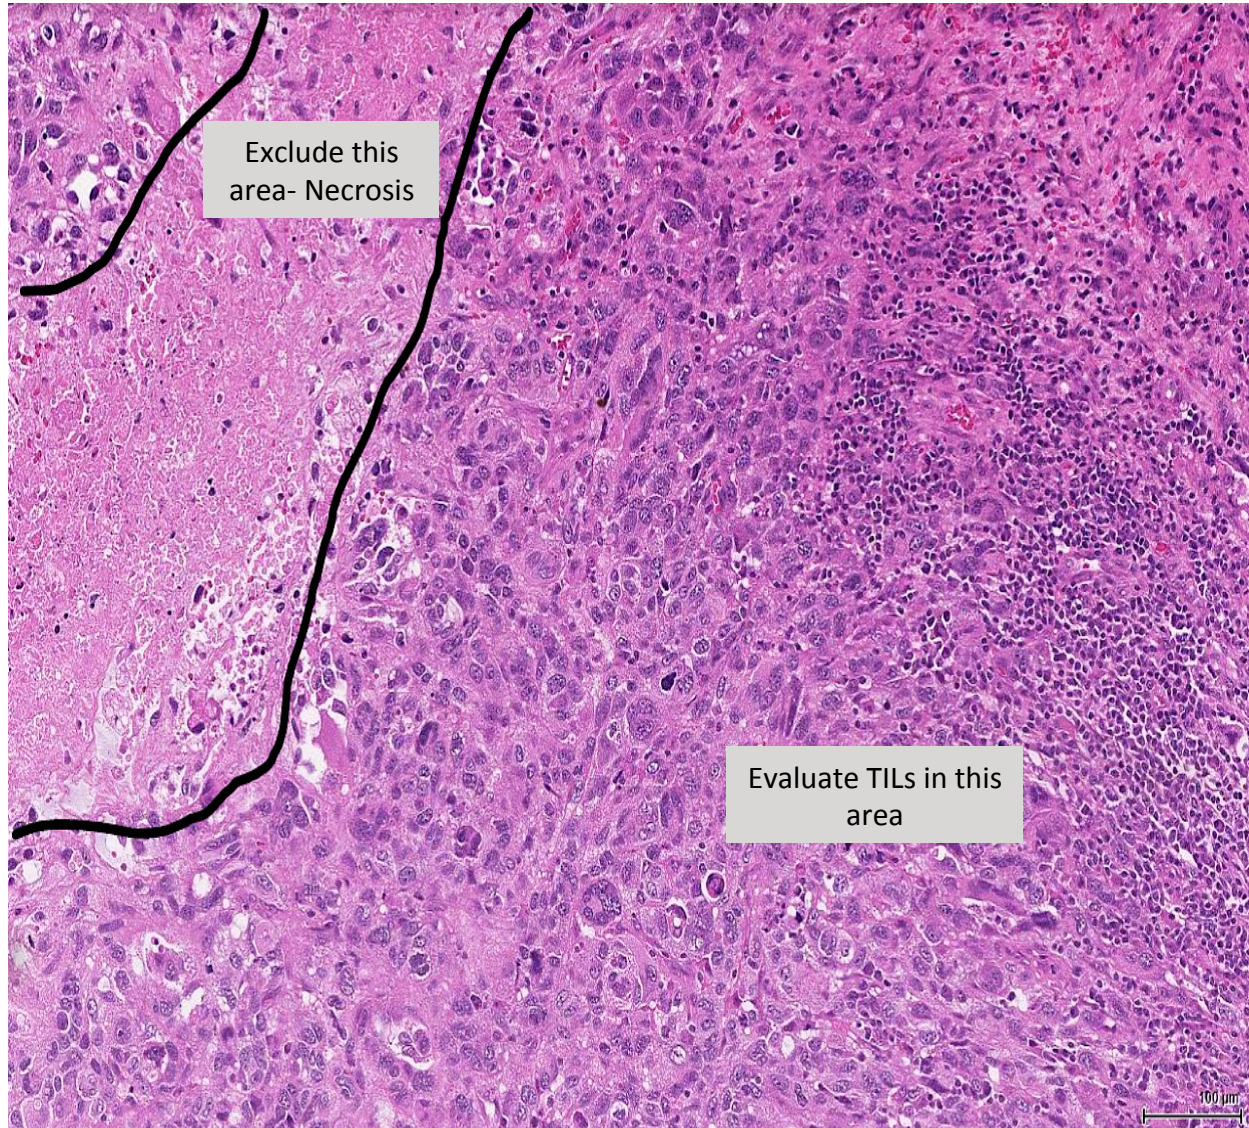

Areas of necrosis or fibrosis are not included in the evaluation



# Define area for TILs evaluation

Do not score TILs in areas containing tumor necrosis (A) or ulceration (B,C)

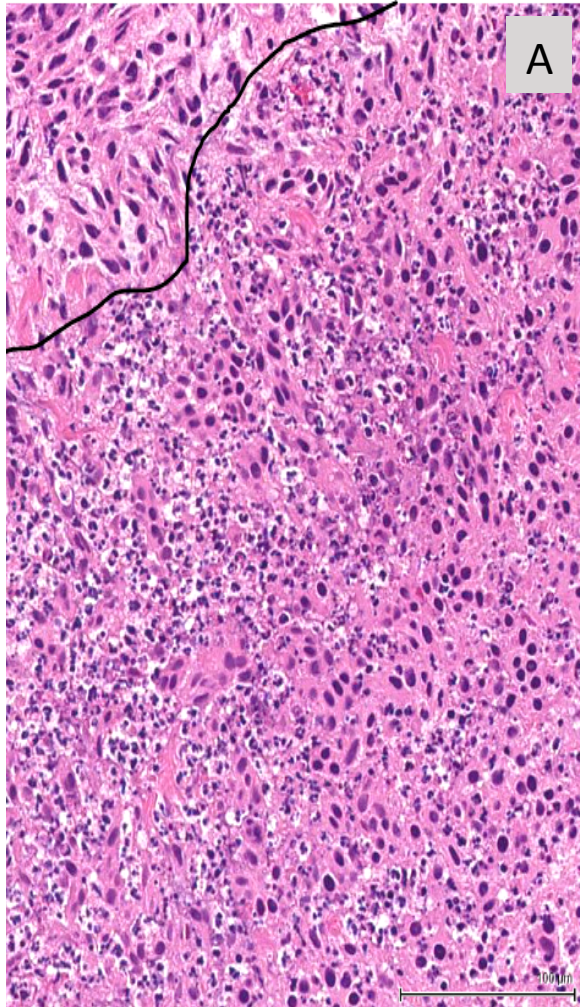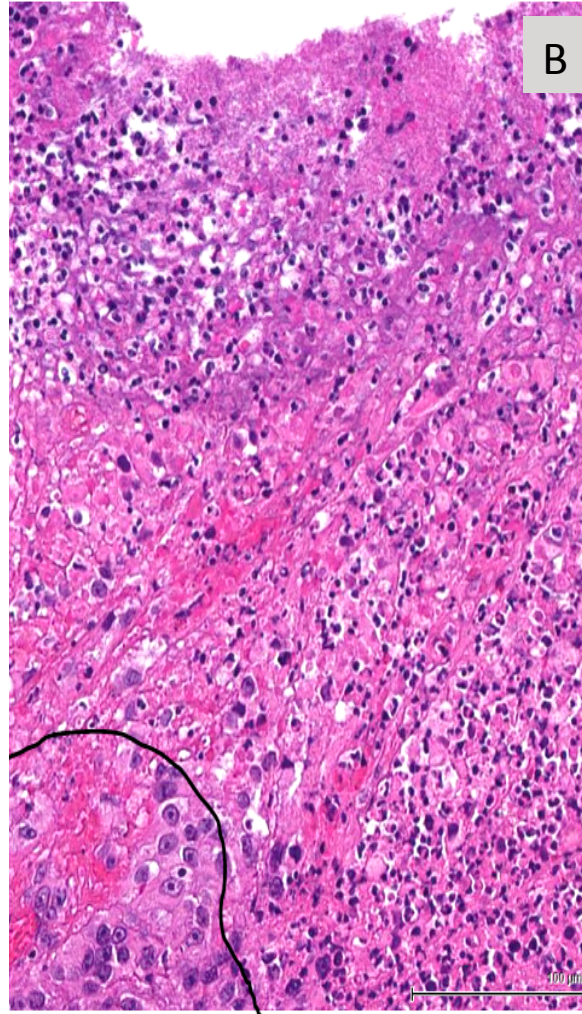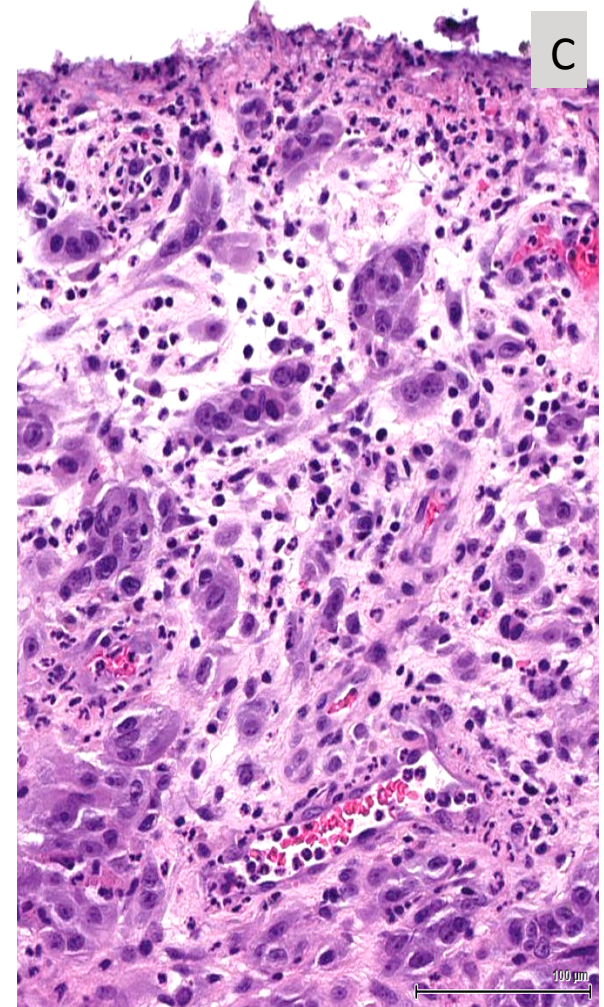



# Determine type of inflammatory infiltrate

Do not score TILs within granulocytic infiltrate in areas of ulceration or tumor necrosis

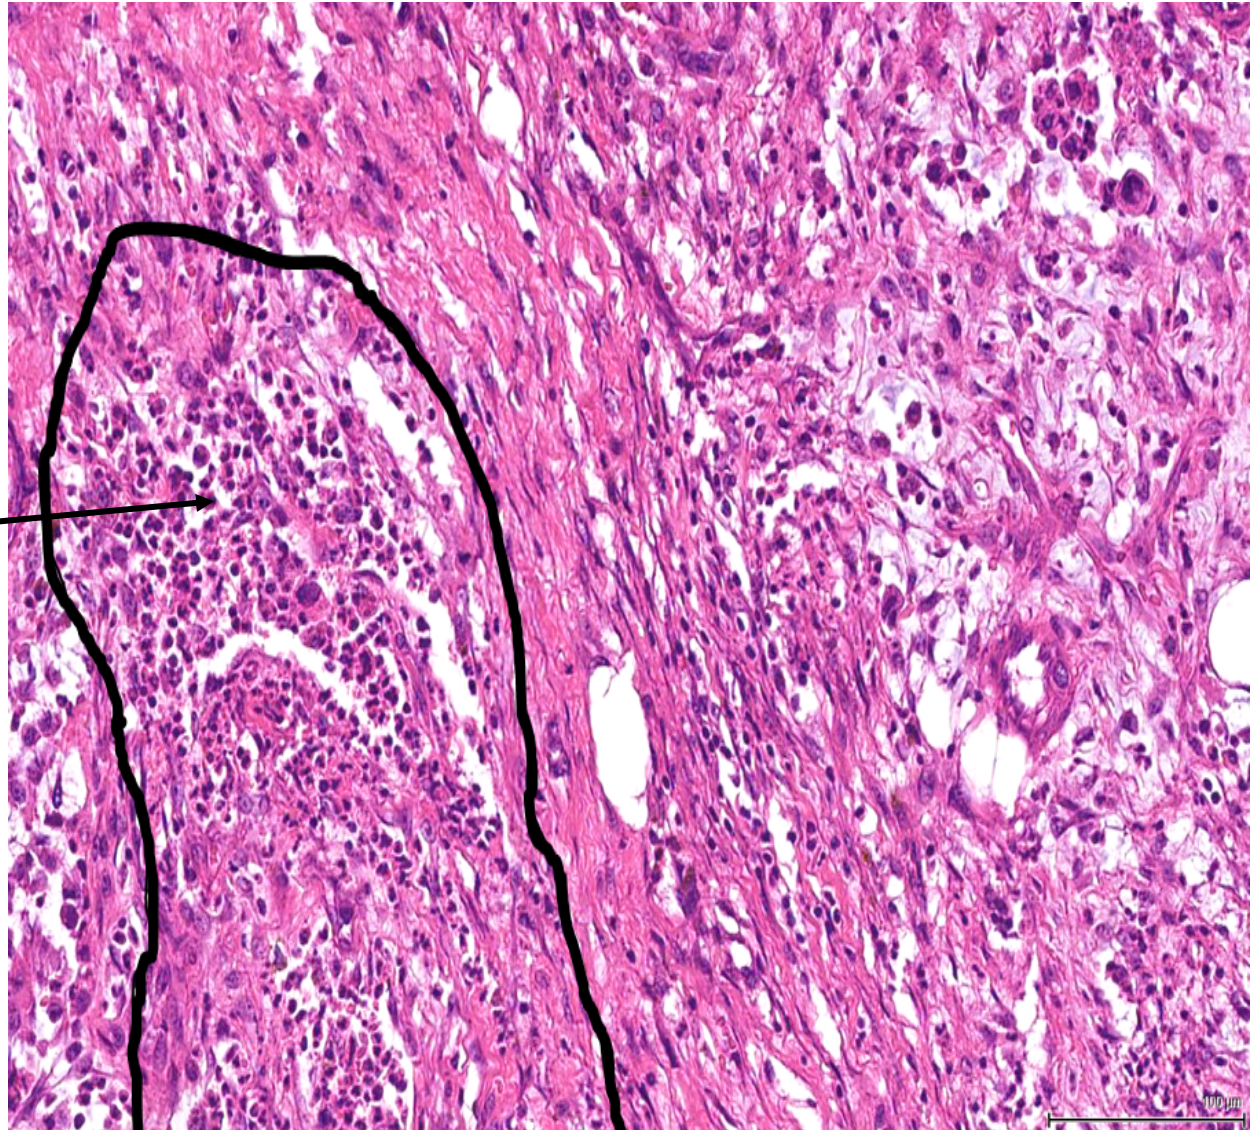



# Determine the localization of inflammatory infiltrate

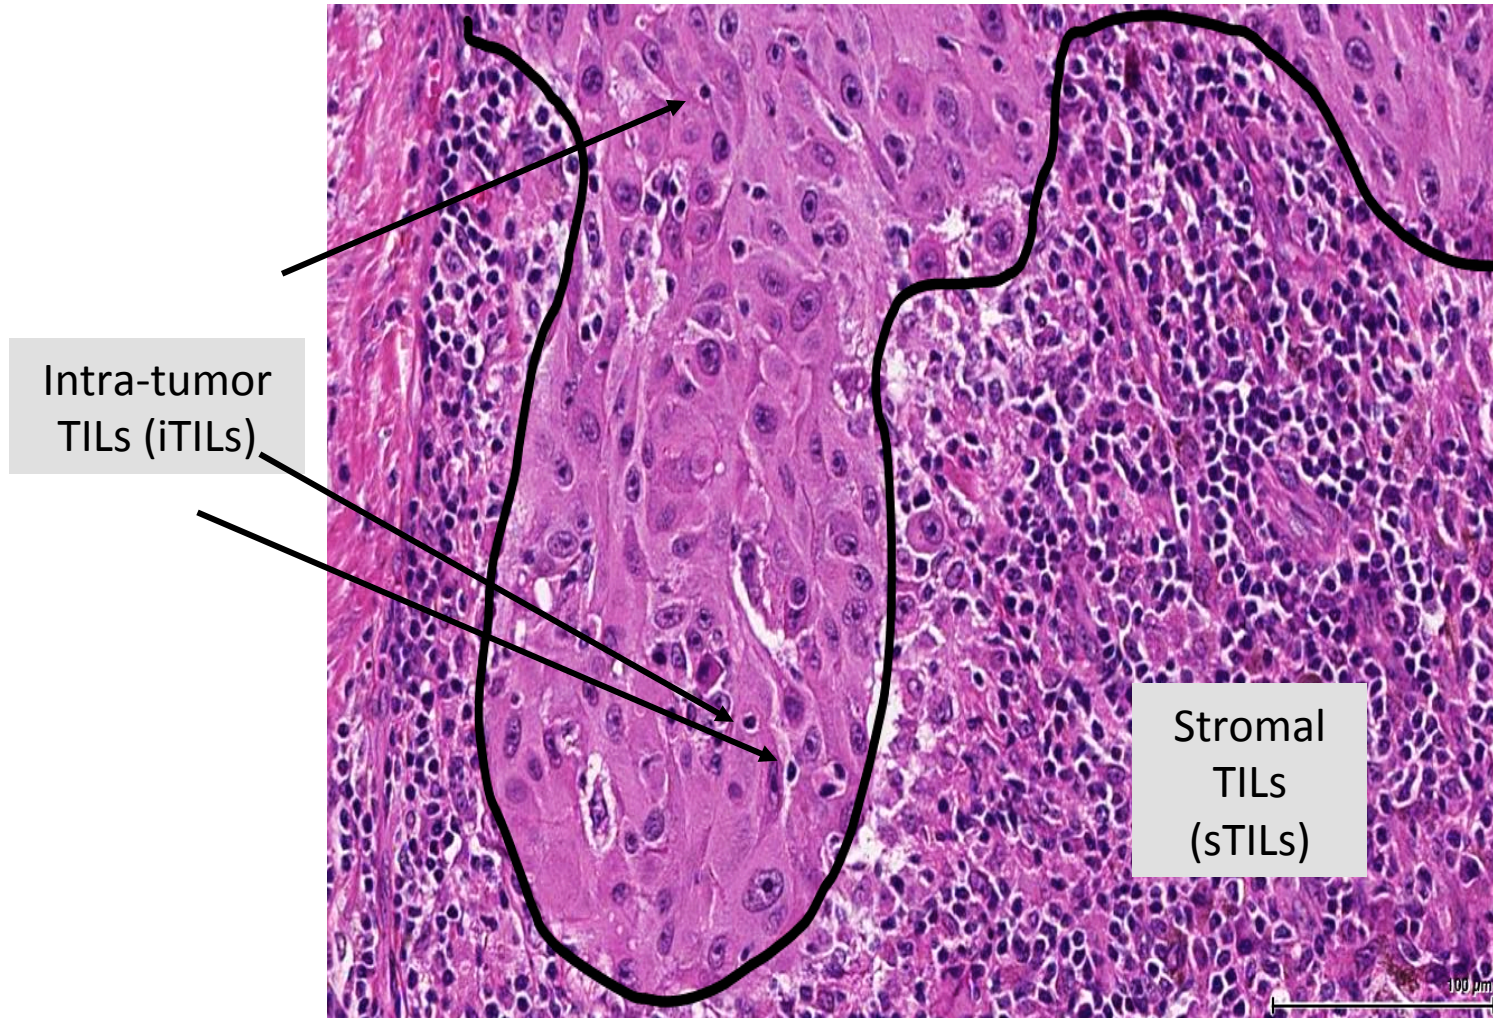



# Determine the localization of inflammatory infiltrate

Only iTILs are currently scored in the clinical setting. sTILs may be reported separately in clinical or research settings.

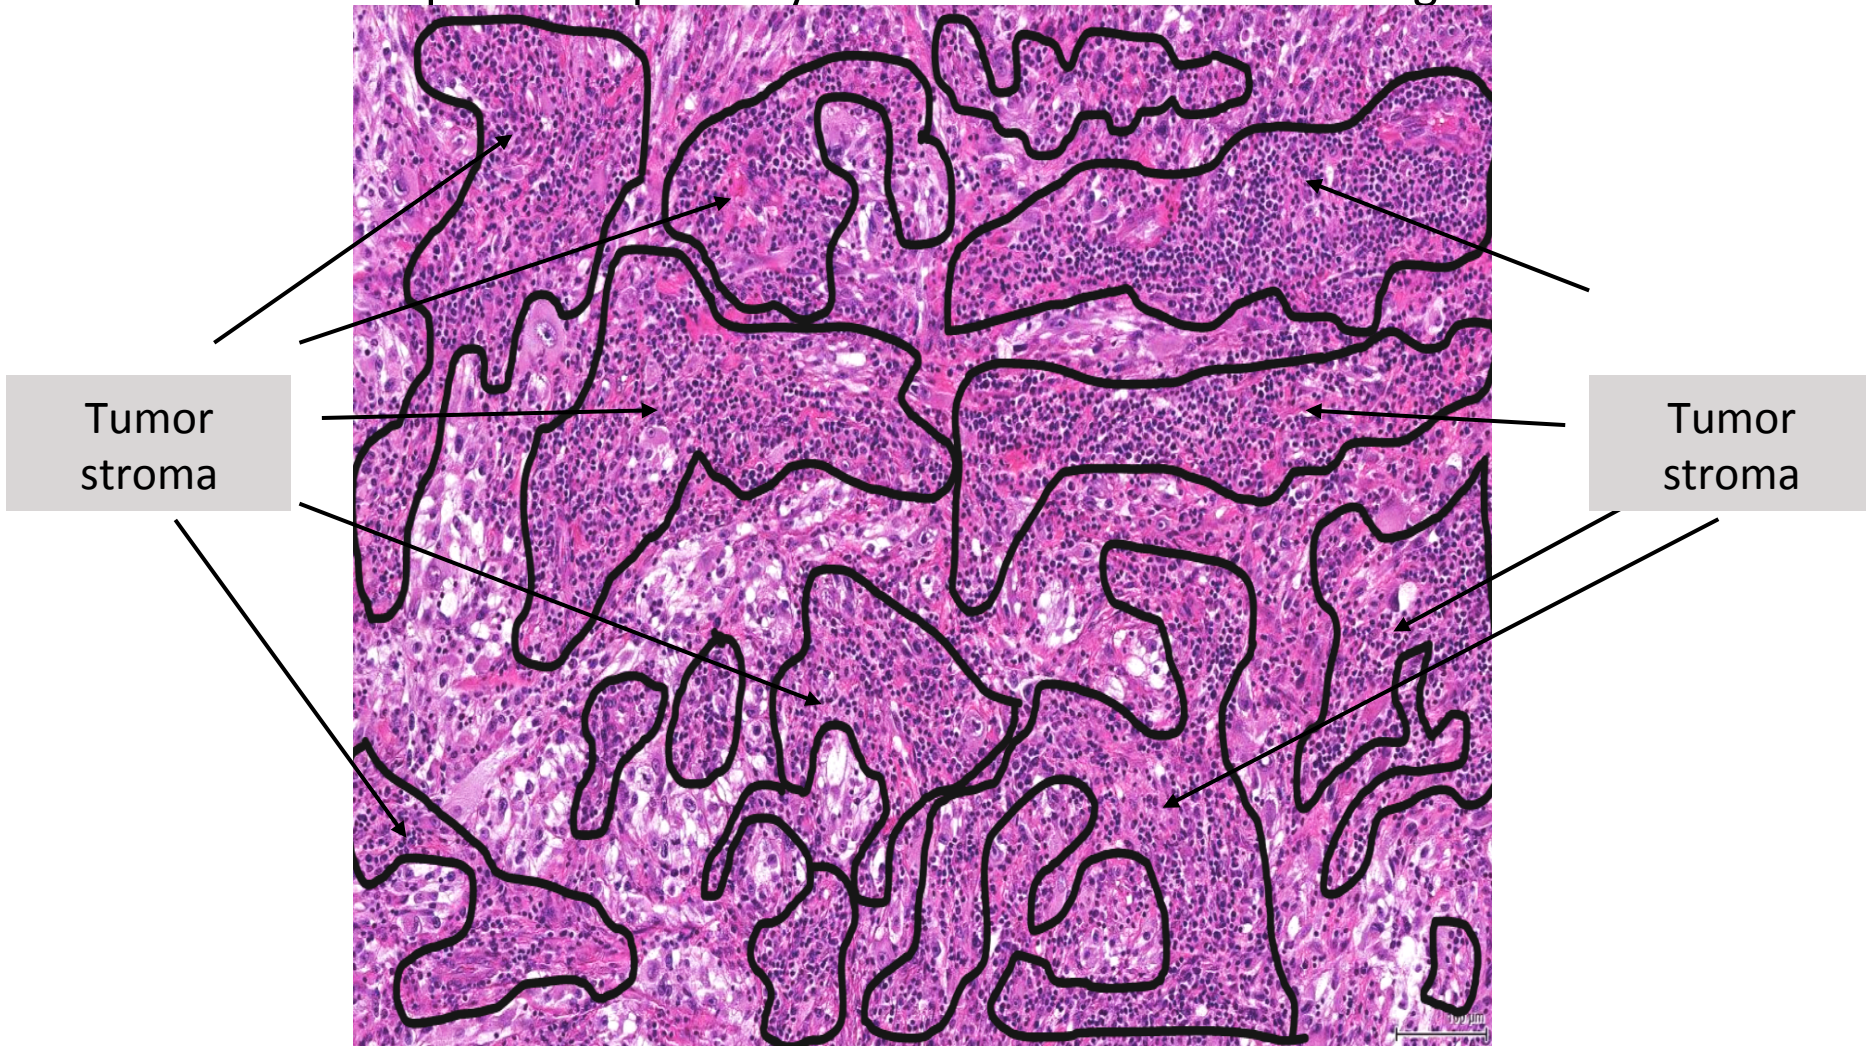



# Determine the localization of inflammatory infiltrate

Only iTILs are currently scored in the clinical setting. sTILs may be reported separately in clinical or research settings.

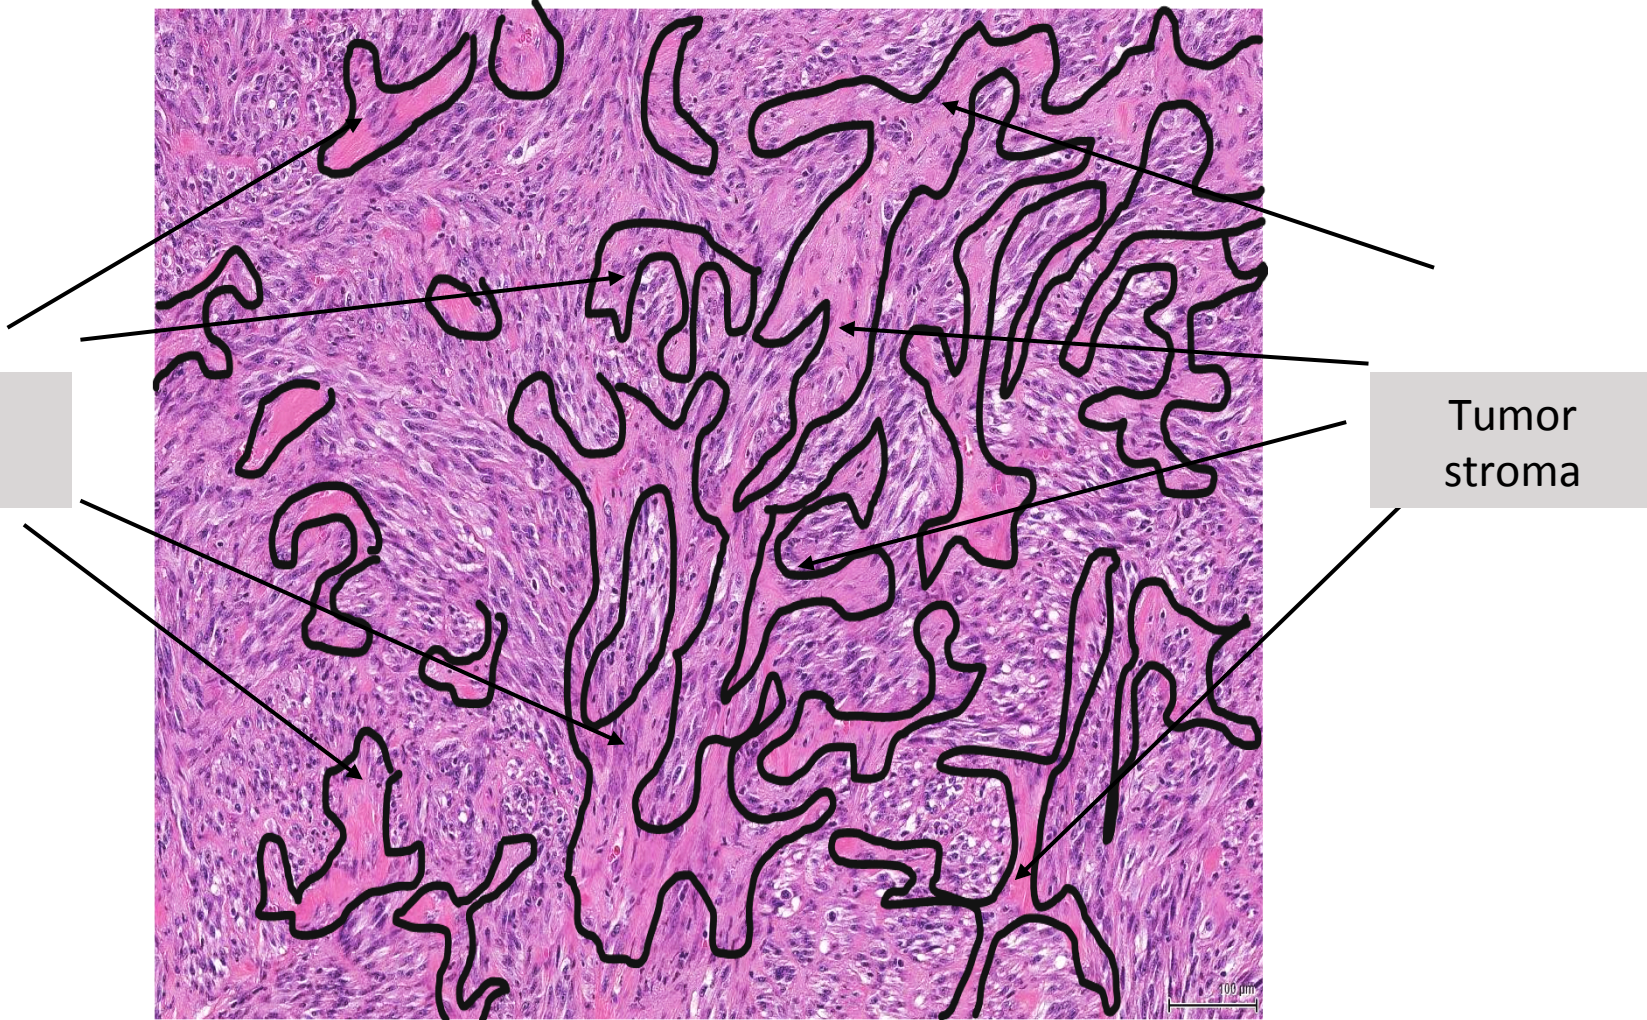



# Examples of assessment of TILs

0–10% stromal TILs

20–40% stromal TILs

50–90% stromal TILs

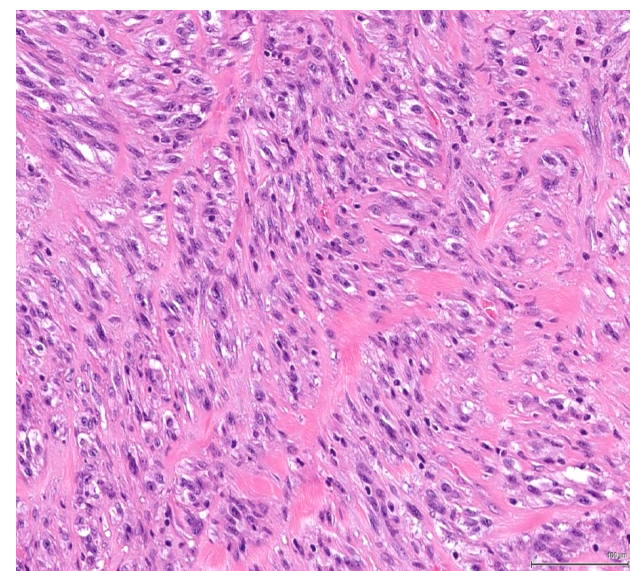

Mild TILs  
(5%)

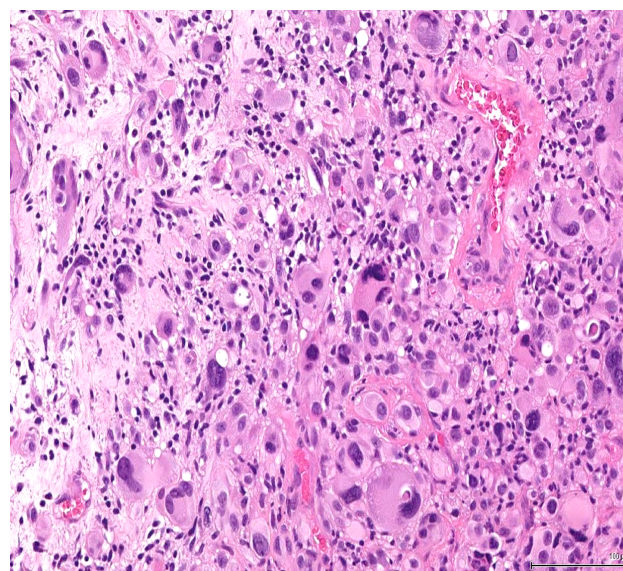

Moderate  
TILs (30%)

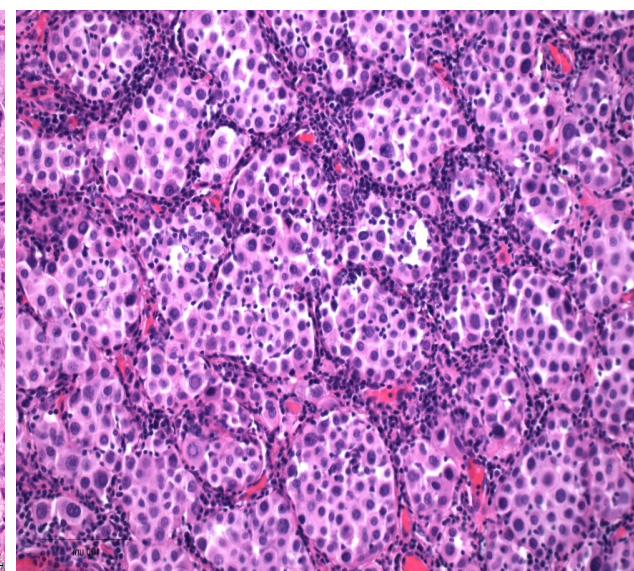

Intense  
TILs  
(90%)
