# Supplementary material
Source: PubMed Central journal article supplement (PMC5638696)
Supplement: NIHMS883270-supplement-Supplemental_Data_File_4.pdf [file NIHMS883270-supplement-Supplemental_Data_File_4.pdf]

# **Evaluation of Tumor Infiltrating Lymphocytes (TILs) in Endometrial Carcinoma**

Guidelines for TILs assessment from the “International  
Immuno-Oncology Biomarker Working Group”

Author: Koen van de Vijver<sup>1</sup>

1-Netherlands Cancer Institute

# Define area for TILs evaluation

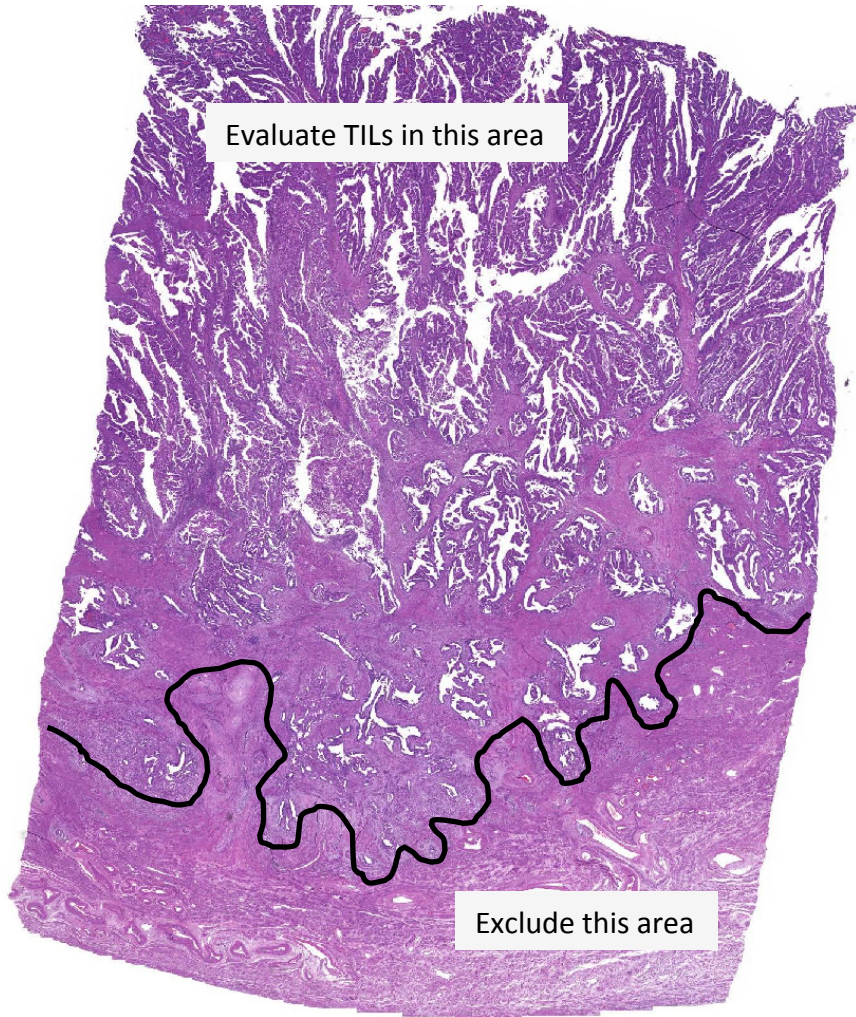

Evaluate TILs within the borders of the tumor, both in the central tumor and at the invasive margin.

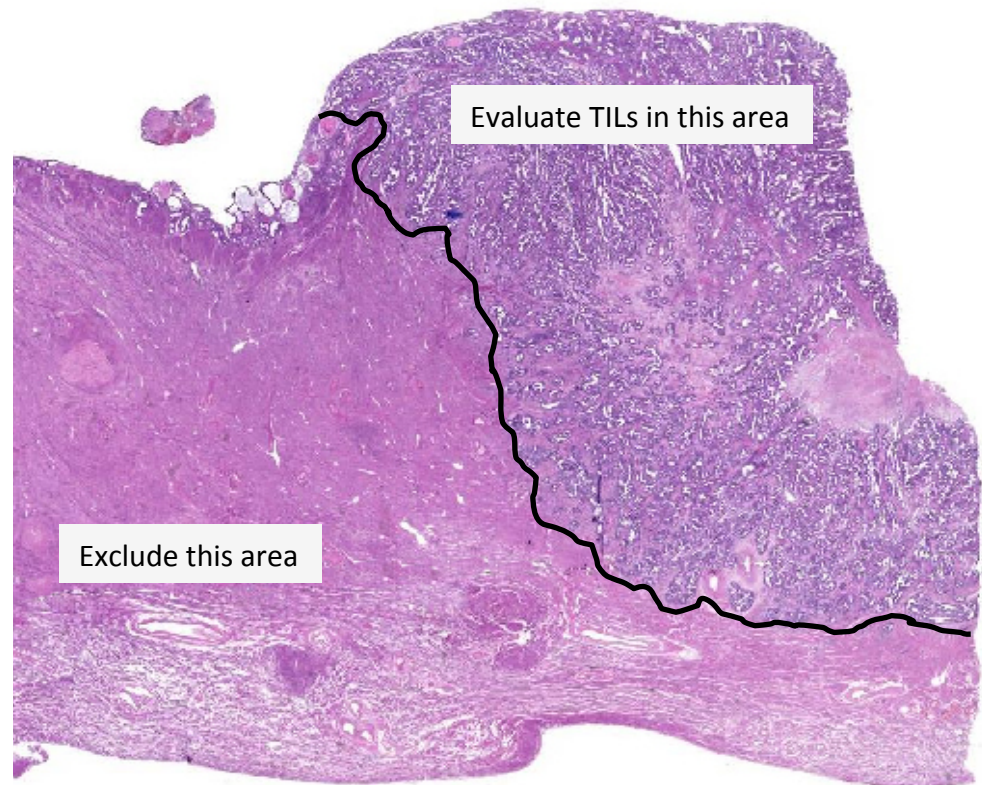

# Define area for TILs evaluation

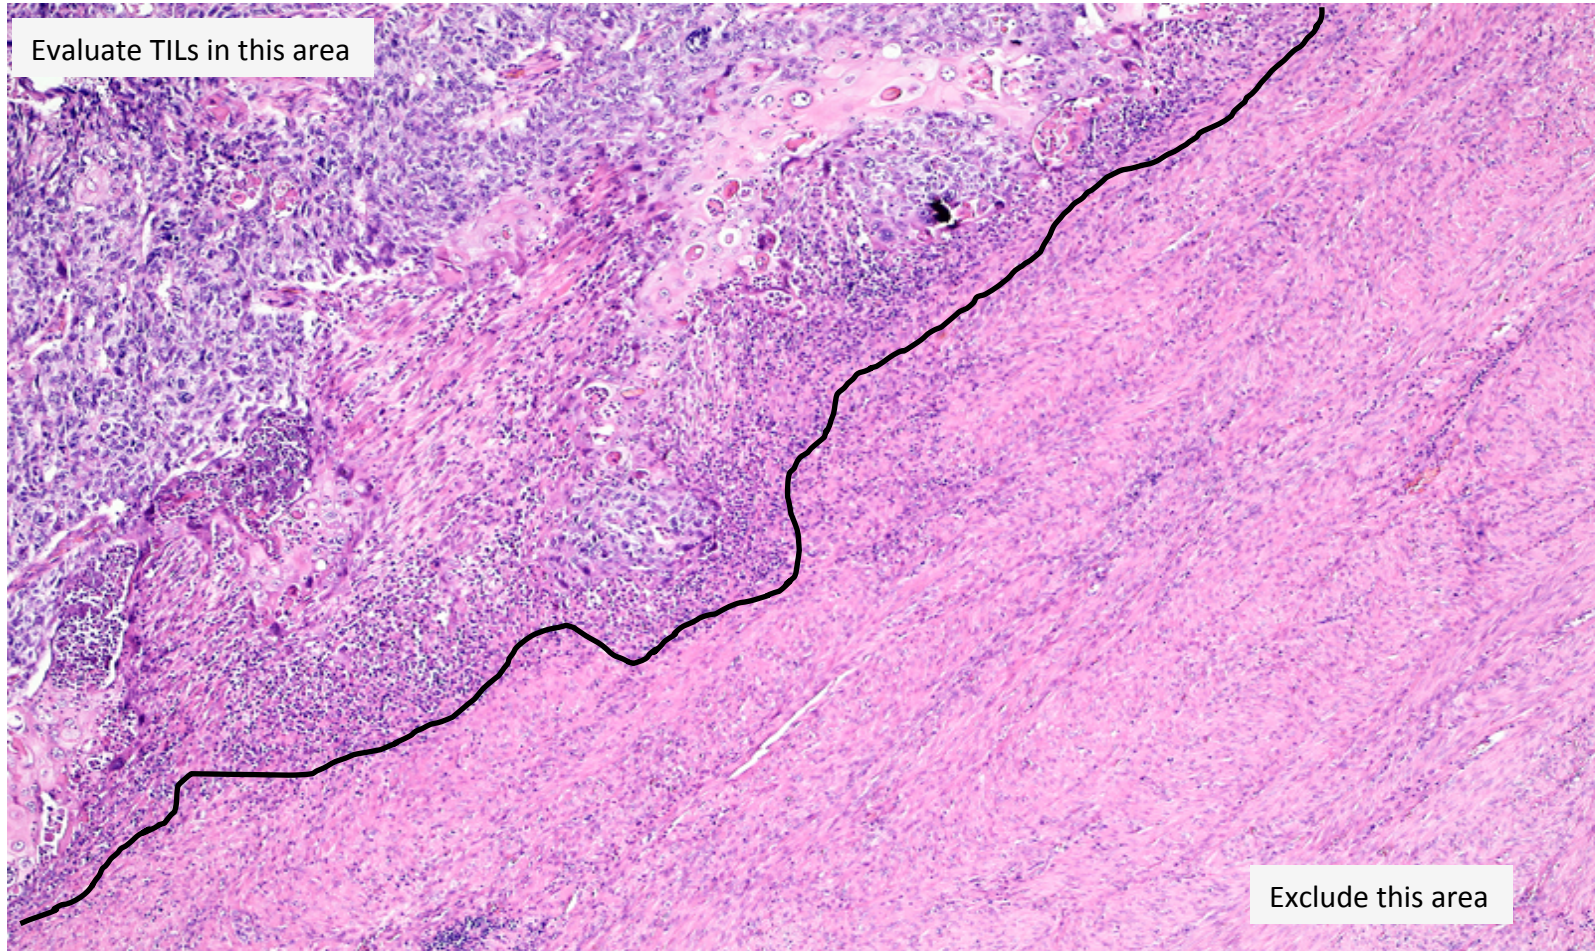

# Define area for TILs evaluation

Patterns of myo-invasion: evaluate TILs in the connective tissue just beneath the epithelial layer within 1mm (invasive margin)

Broad front pattern

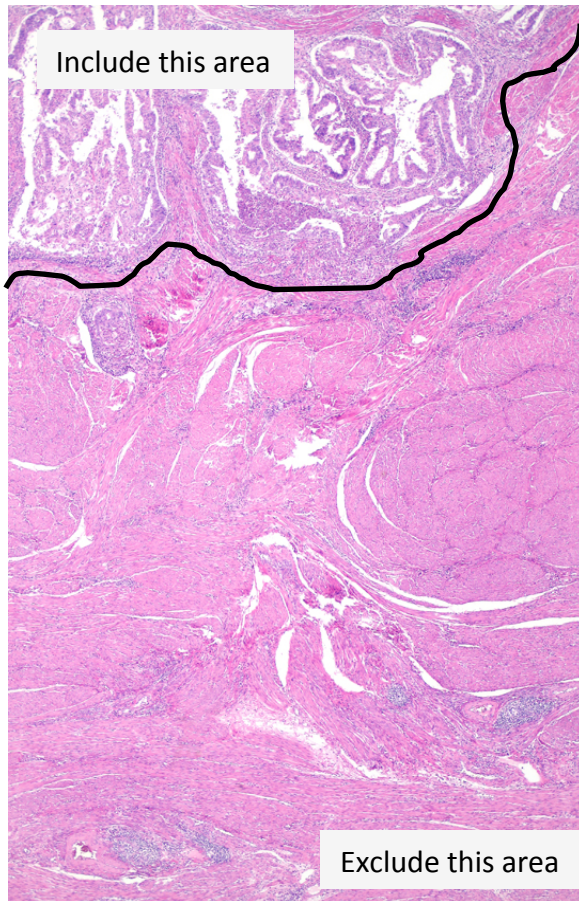

Adenomyotic pattern

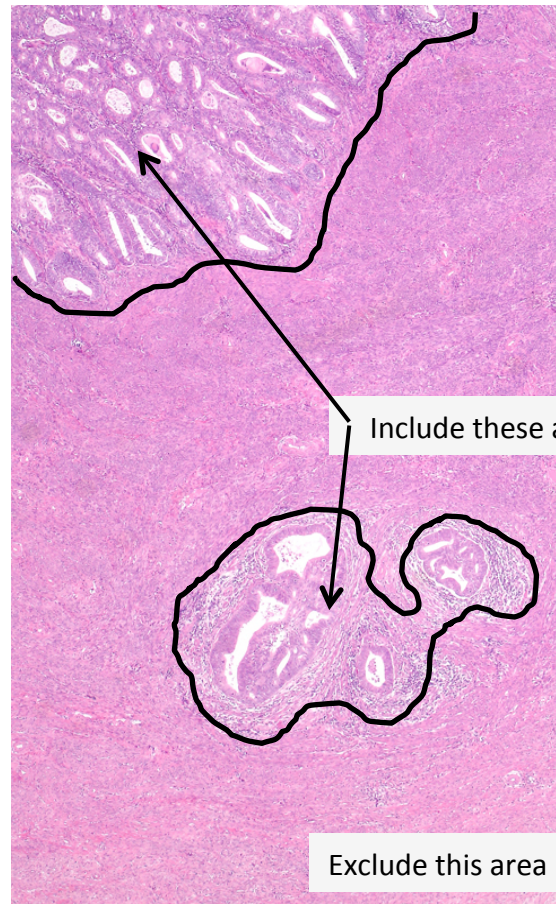

Widely separated single-glands

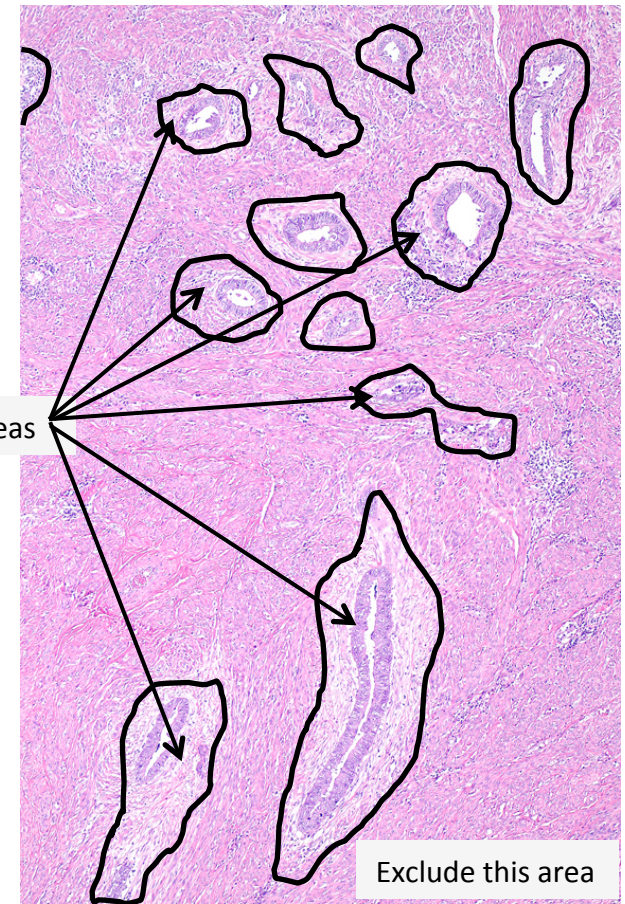

# Define area for TILs evaluation

Immune infiltrates outside of the tumor borders are not included.

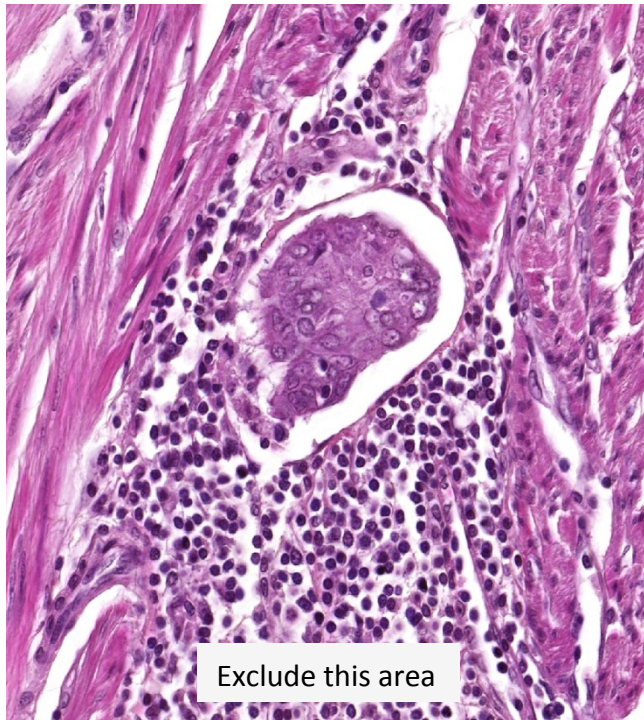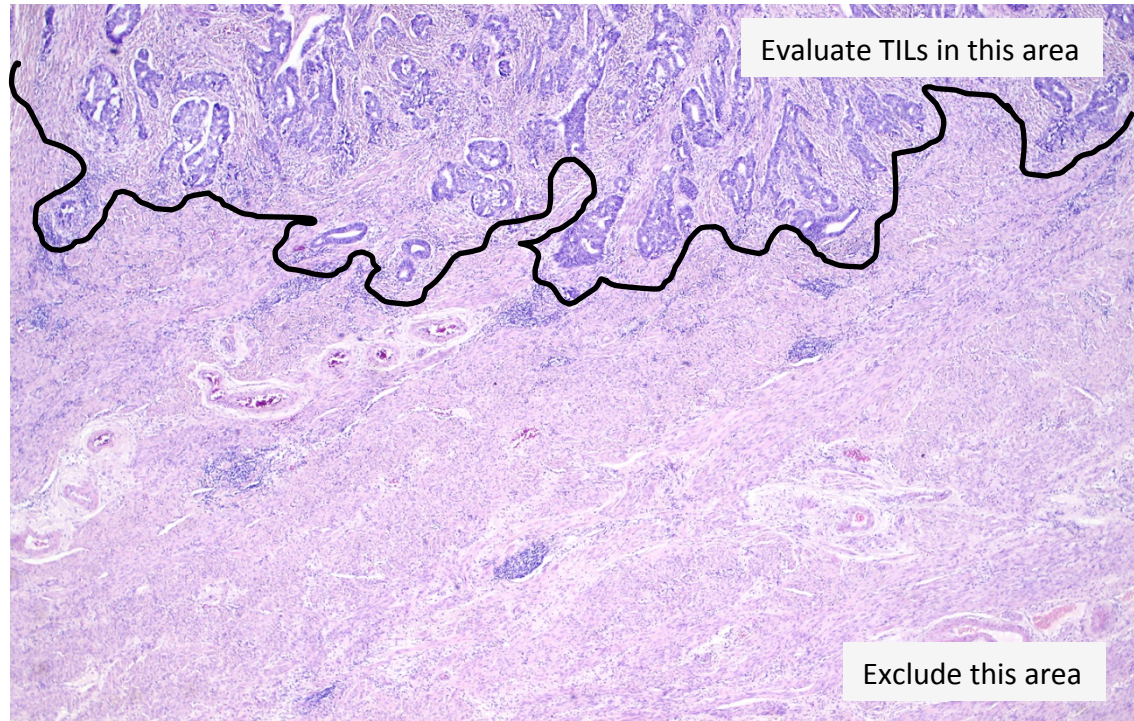

Do not include perivascular immune infiltrates, often present around lymphovascular space invasion (LVSI).

# Define area for TILs evaluation

Be aware of tumor present in adenomyosis: small endometrial stromal cells may mimic immune cells

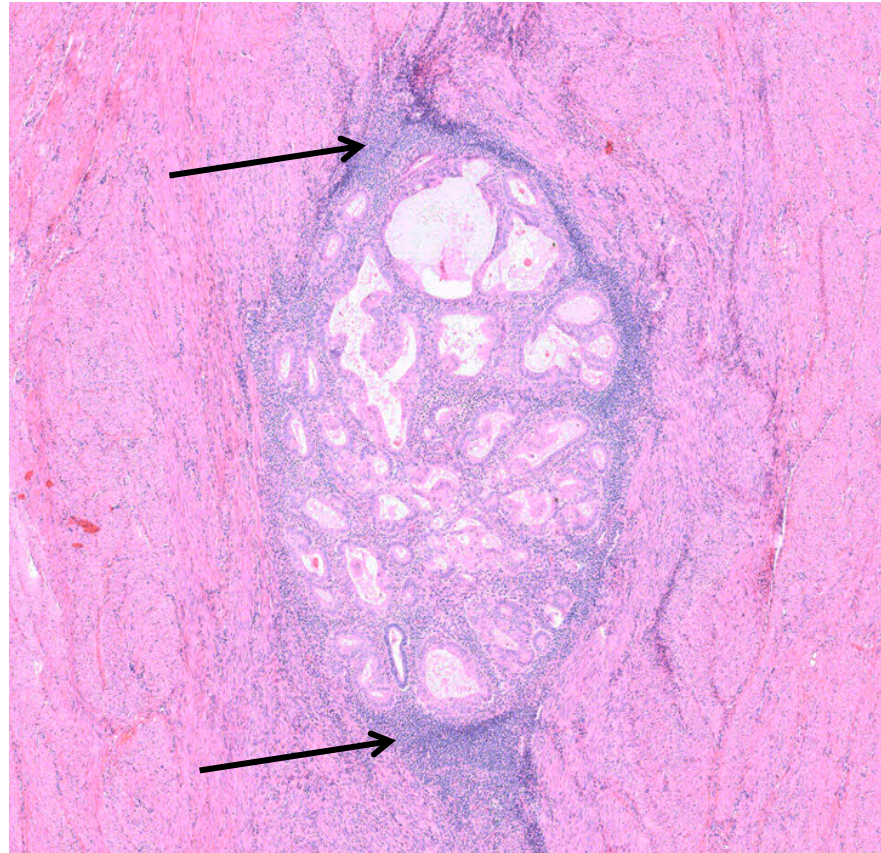

# Define area for TILs evaluation

Do not use areas with poor fixation

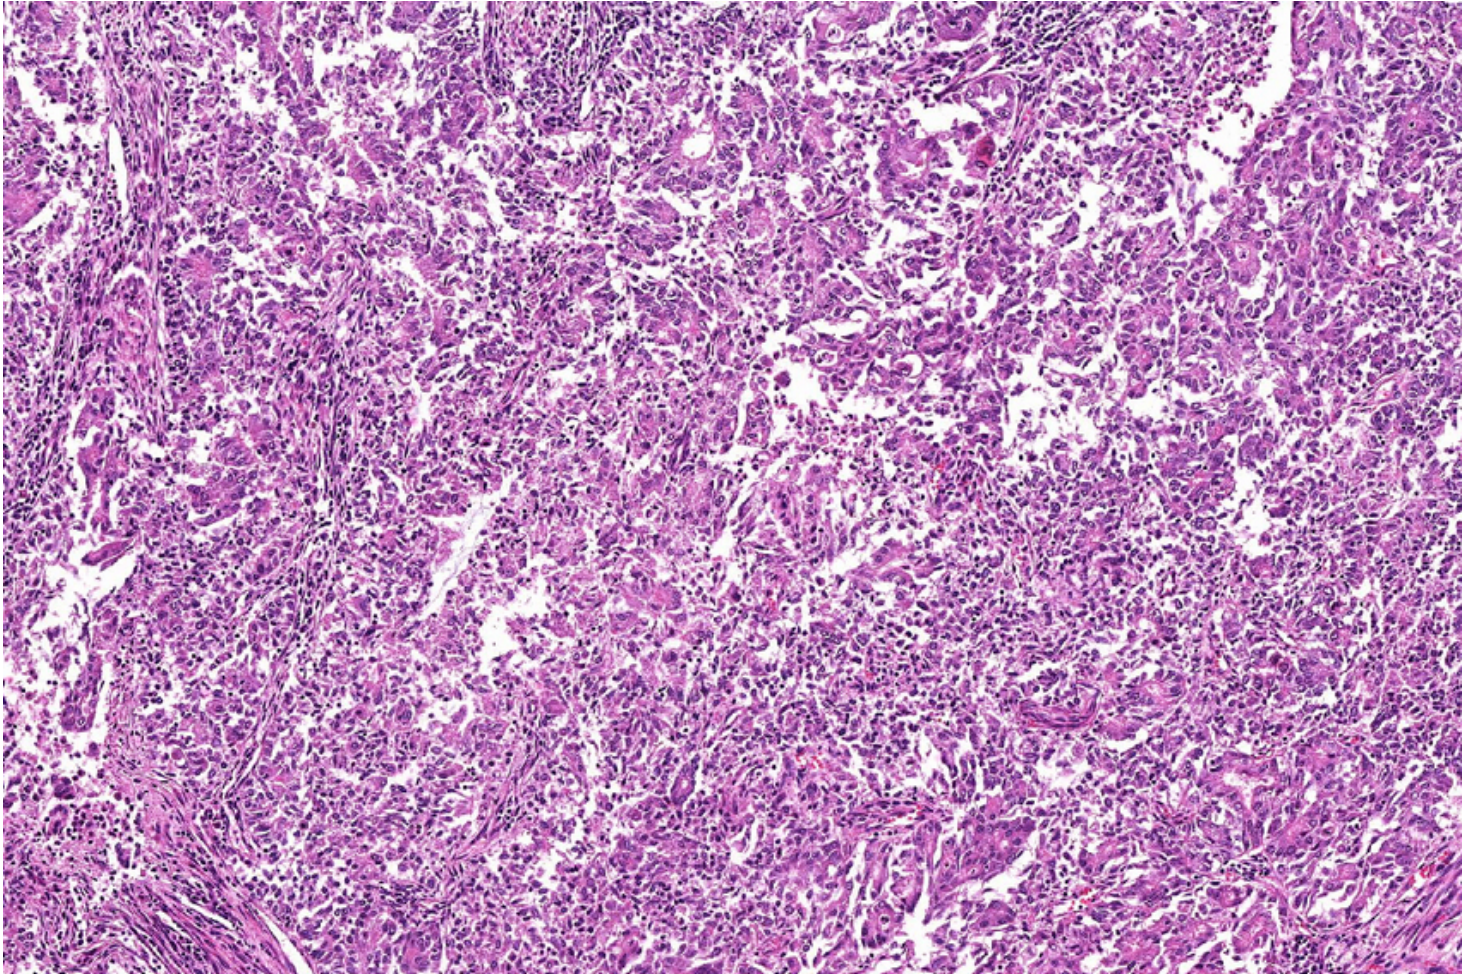

# Determine the localization of the TILs

Stromal TILs

Intratatumoral TILs

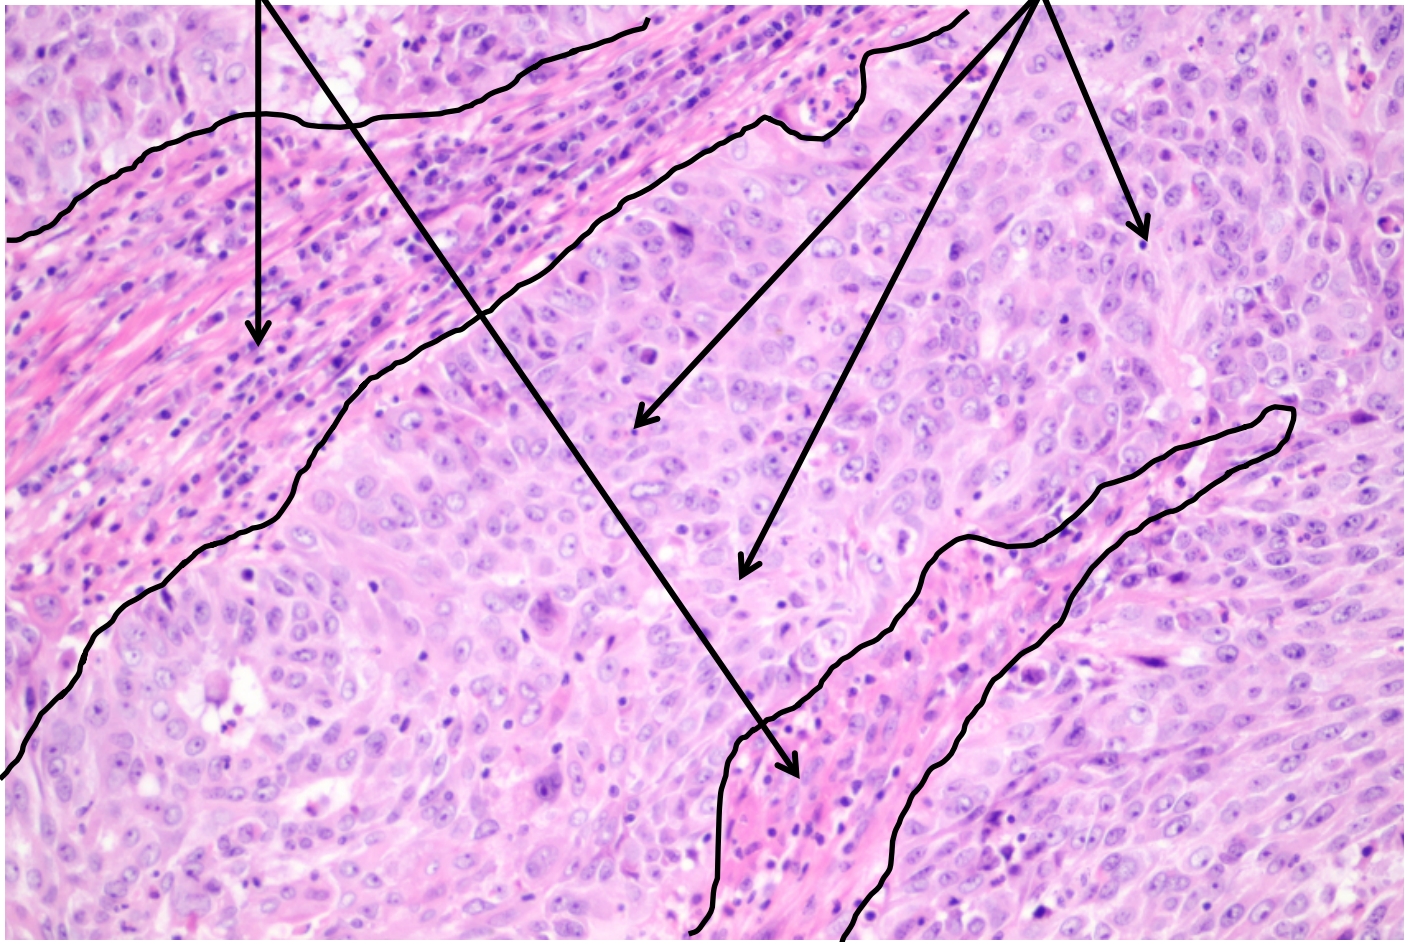



# Determine the localization of the TILs

Stromal TILs  
(include fibrovascular cores of papillary structures)

Intratatumoral TILs

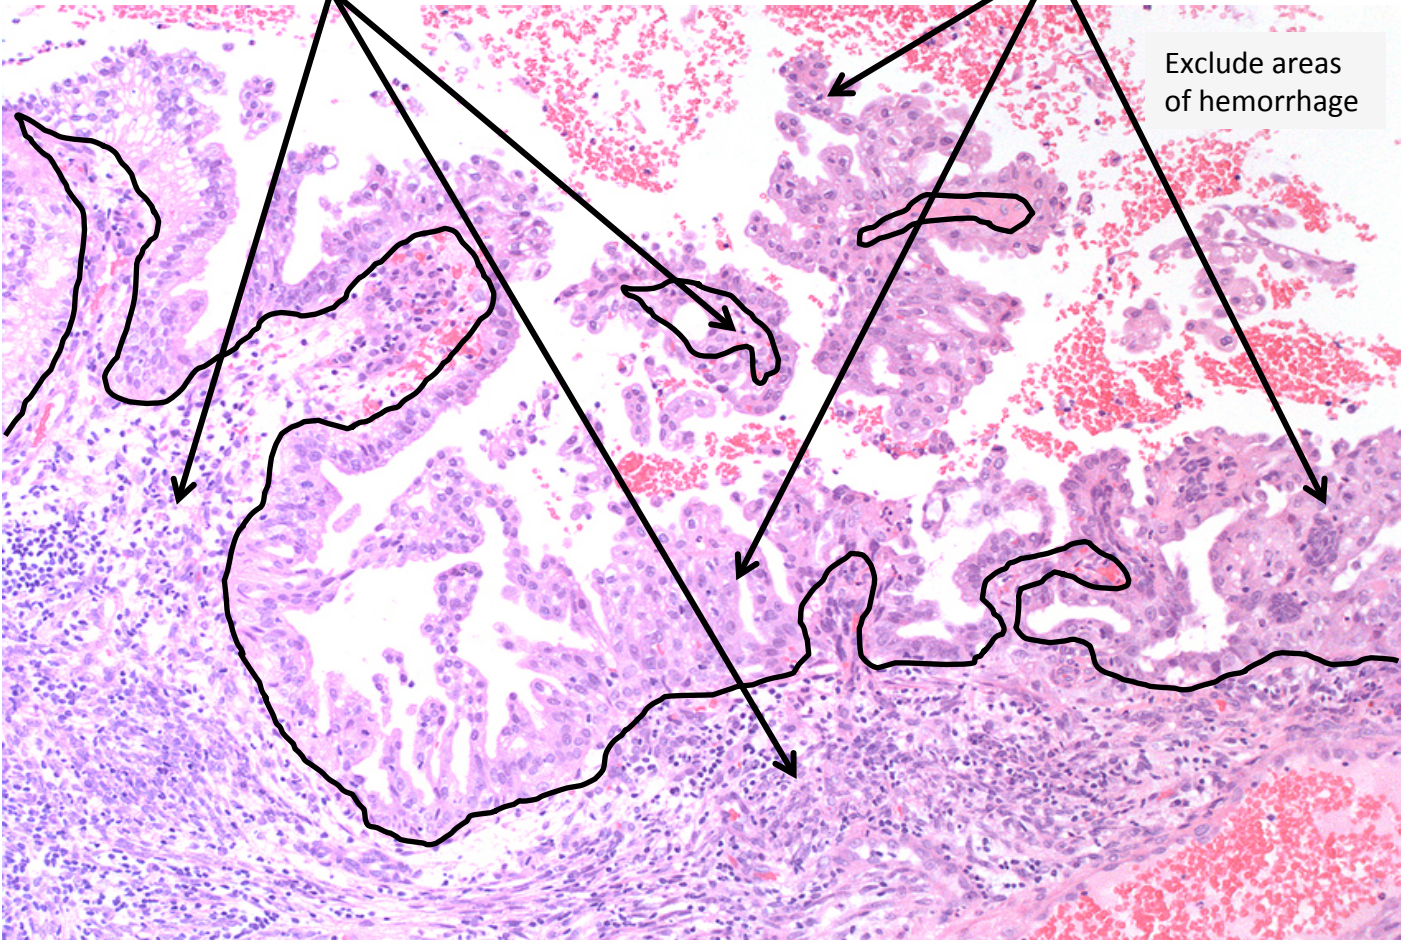

# Determine the localization of the TILs

Be aware of endometrial carcinomas with a spindled, sarcomatoid or solid growth

Stromal TILs

Intratatumoral TILs  
(spindled growth  
of the tumor)

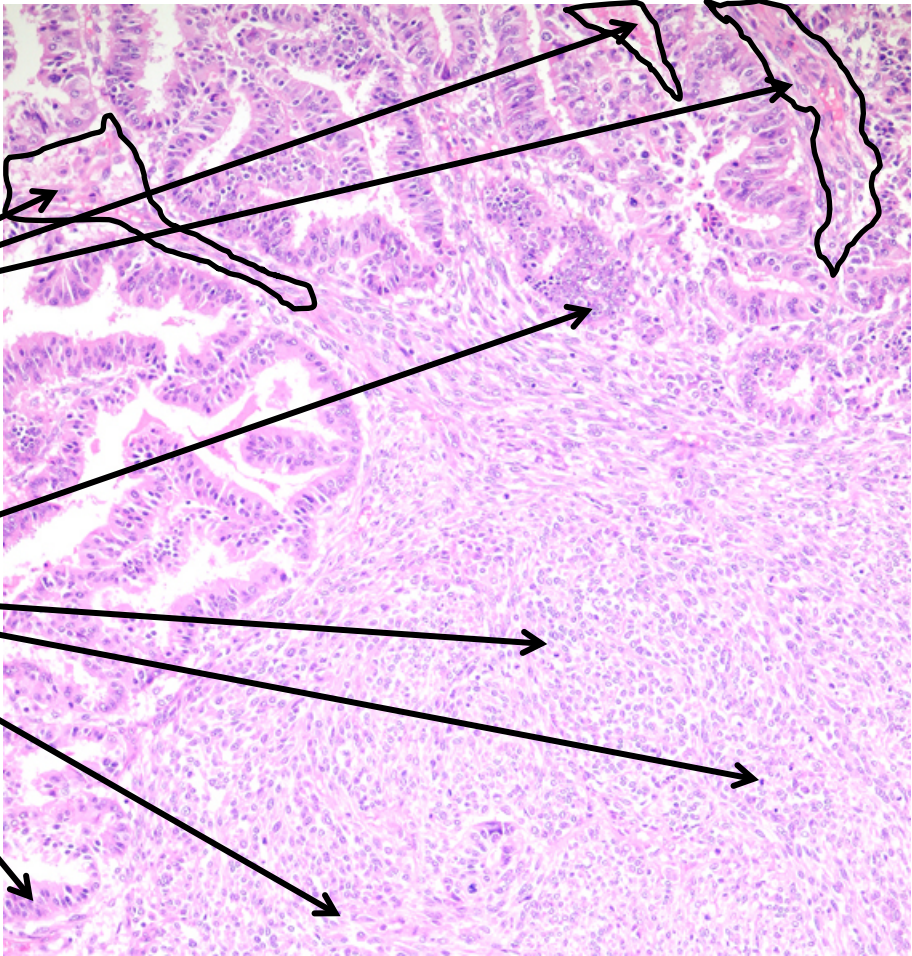

# Determine type of inflammatory infiltrate

Include only mononuclear infiltrate  
(lymphocytes & plasma cells)

Exclude areas of necrosis  
for evaluation of TILs

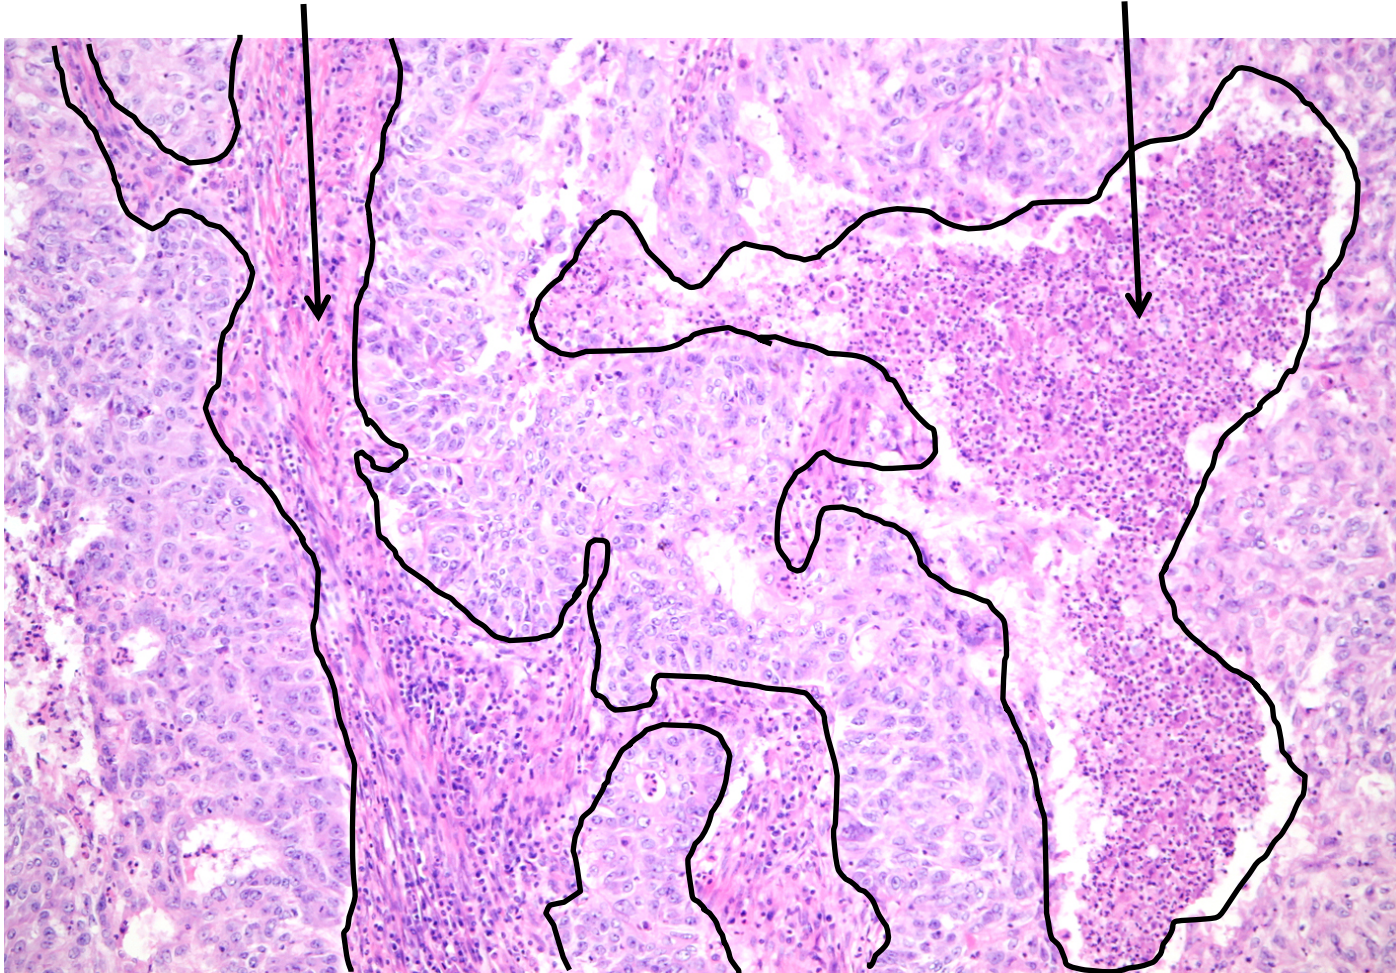

# Determine type of inflammatory infiltrate

Score only mononuclear infiltrate: a MELF pattern of invasion is often accompanied by a neutrophilic infiltrate: exclude this area

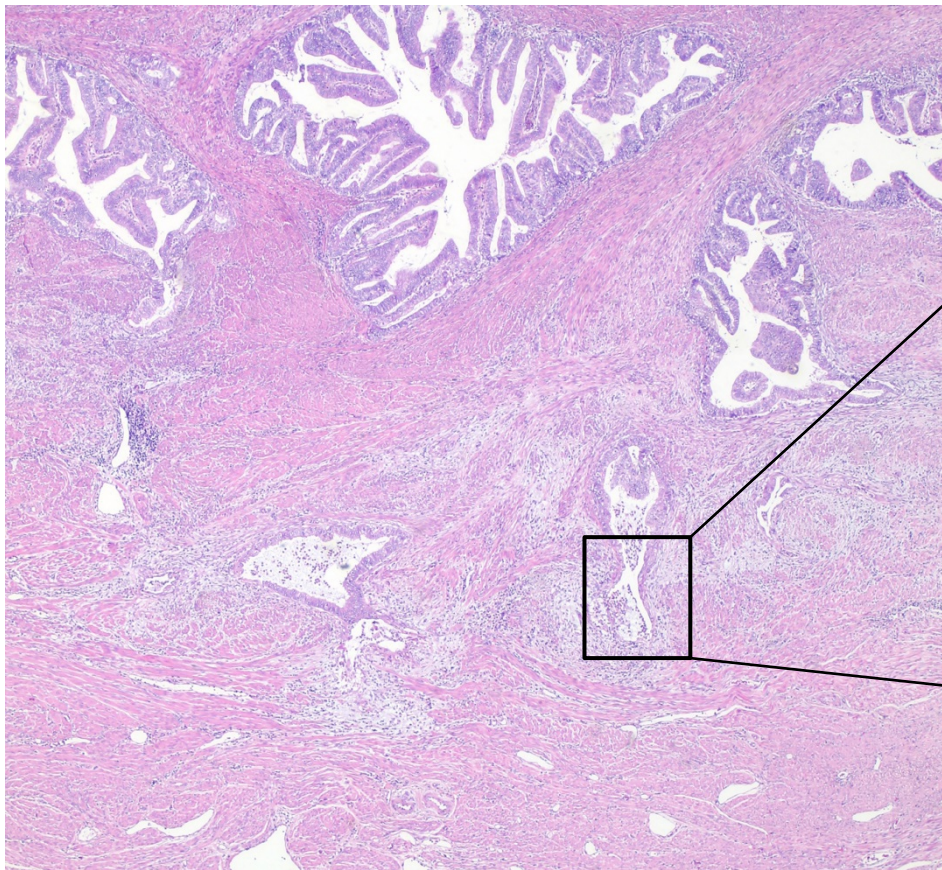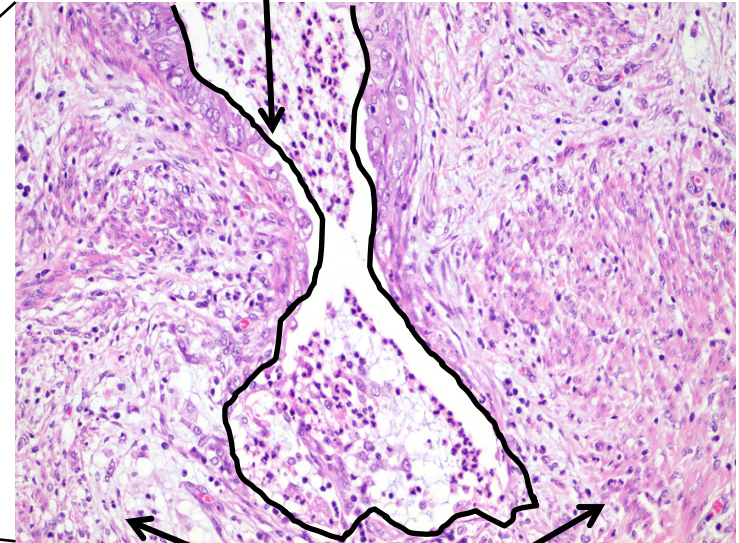

Evaluate TILs in this area

(MELF = microcystic, elongated and fragmented)
