# Supplementary material
Source: PubMed Central journal article supplement (PMC5638696)
Supplement: NIHMS883270-supplement-Supplemental_Data_File_6.pdf [file NIHMS883270-supplement-Supplemental_Data_File_6.pdf]

# **Evaluation of Tumor Infiltrating Lymphocytes (TILs) in Urothelial Carcinoma**

Guidelines for TILs assessment  
from “International Immuno-Oncology Biomarker  
Working Group”

Authors: Thomas Gevaert<sup>1</sup> and Yves Allory<sup>2</sup>

1- KU Leuven and AZ Klina, Belgium. 2-Université Paris-Est, INSERM and APHP, Hôpital Henri-Mondor, France.

# Define area for TILs evaluation

- TILs should be evaluated within the borders of the invasive tumor
- The invasive edge is included in the evaluation, but not reported separately
- Immune infiltrates outside of the tumor borders are not included

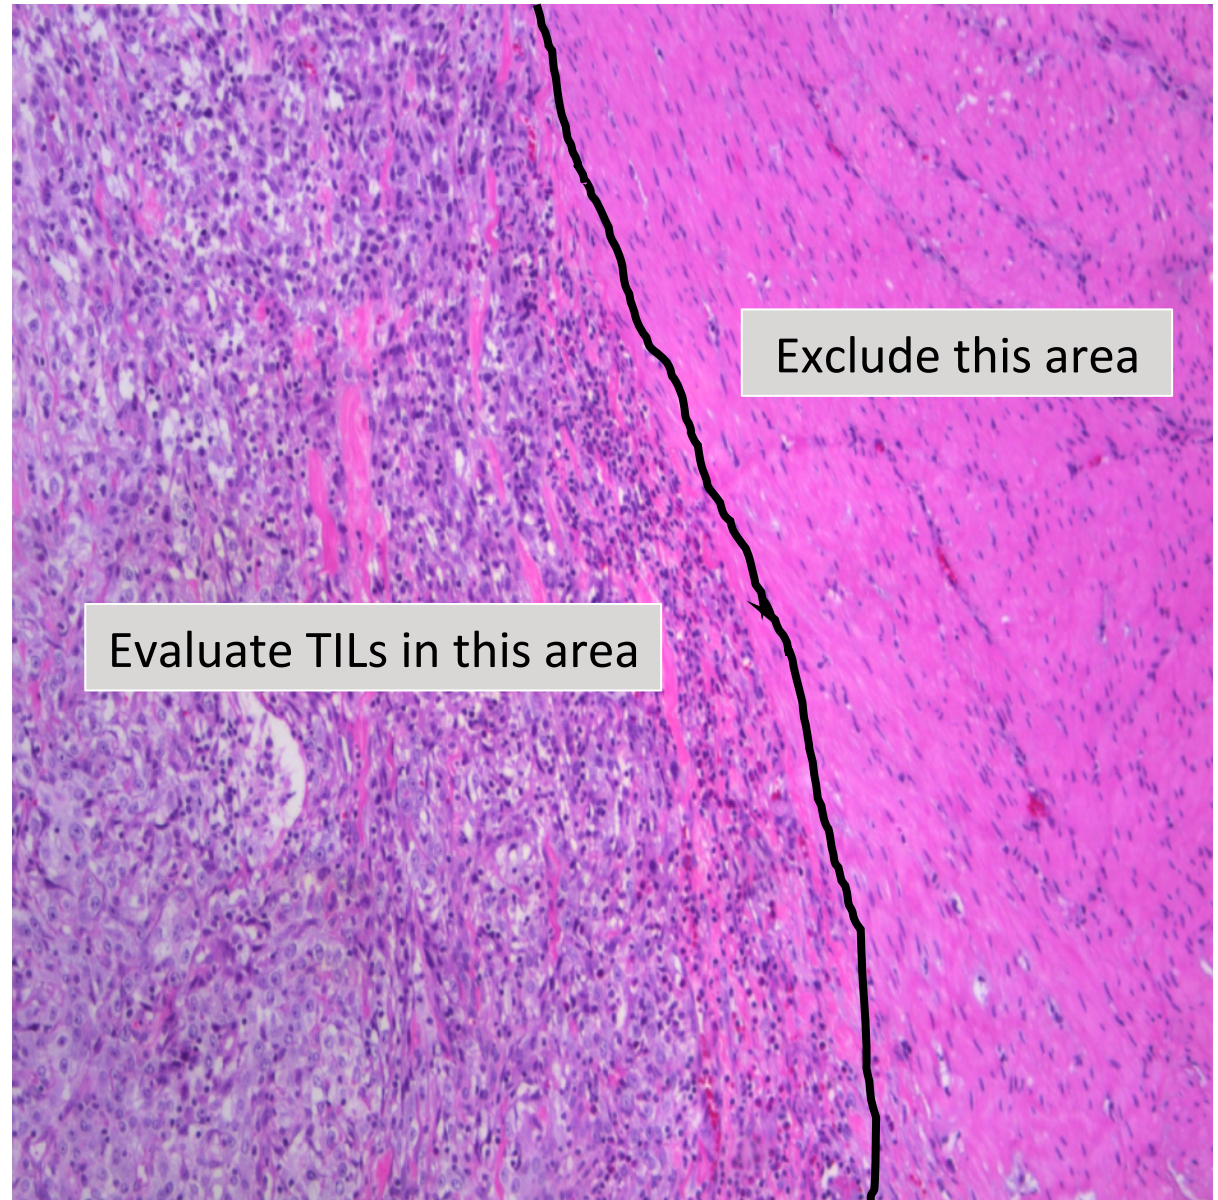

# Define area for TILs evaluation

- TILs should be evaluated within the borders of the invasive tumor
- The invasive edge is included in the evaluation, but not reported separately
- Immune infiltrates outside of the tumor borders are not included

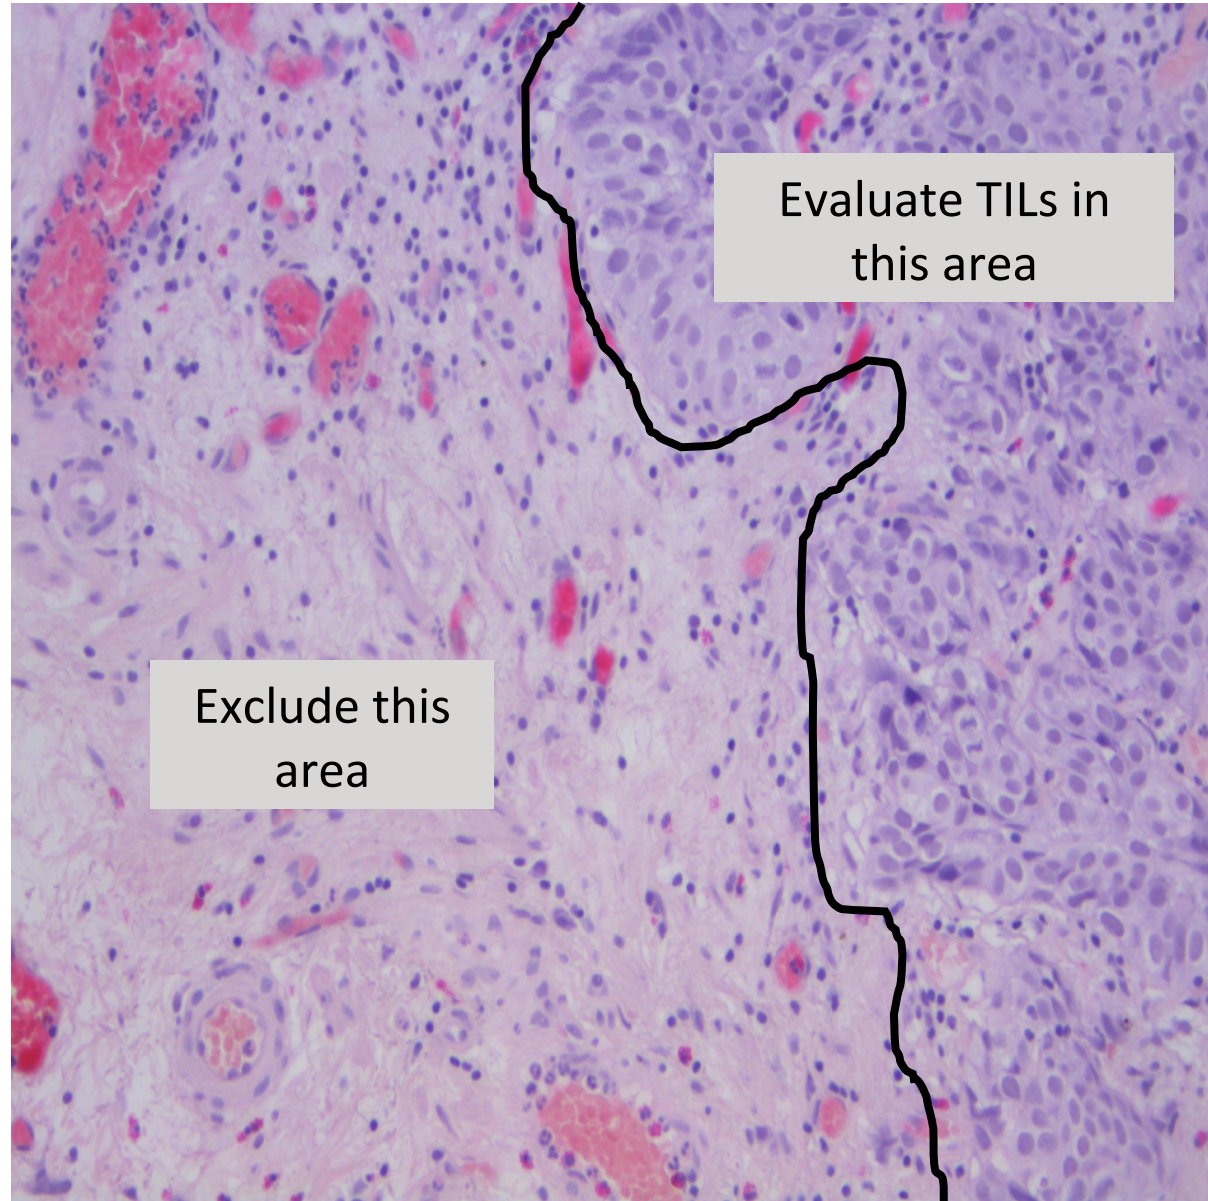

# Define area for TILs evaluation

Include TILs evaluation in stroma pertaining to fibrovascular cores of **INVASIVE** papillary structures

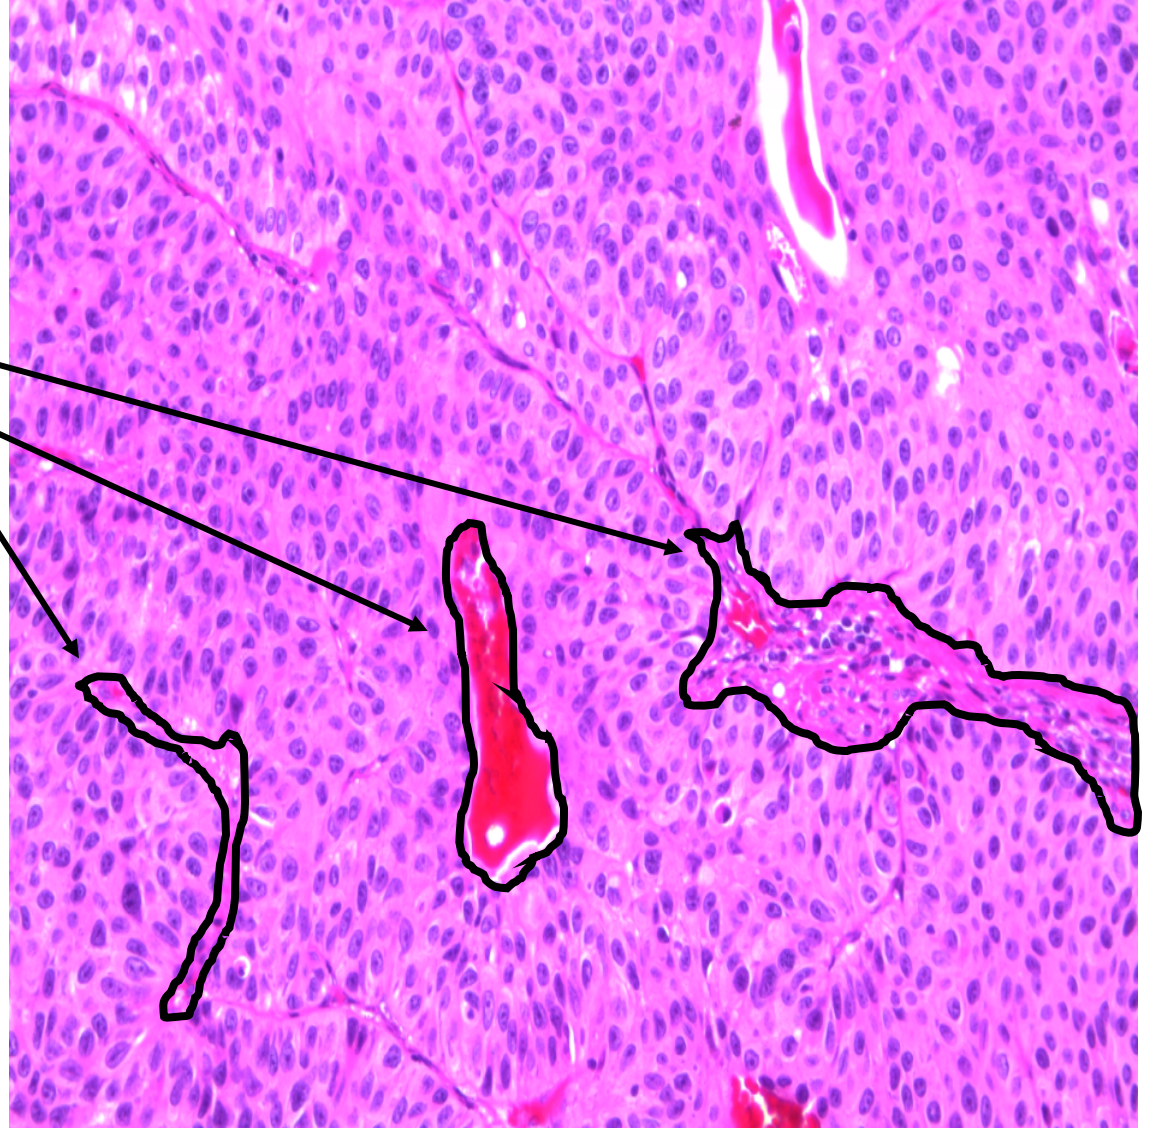

# Define area for TILs evaluation

Exclude TILs evaluation in stroma pertaining to fibrovascular cores of **NON-INVASIVE** papillary structures

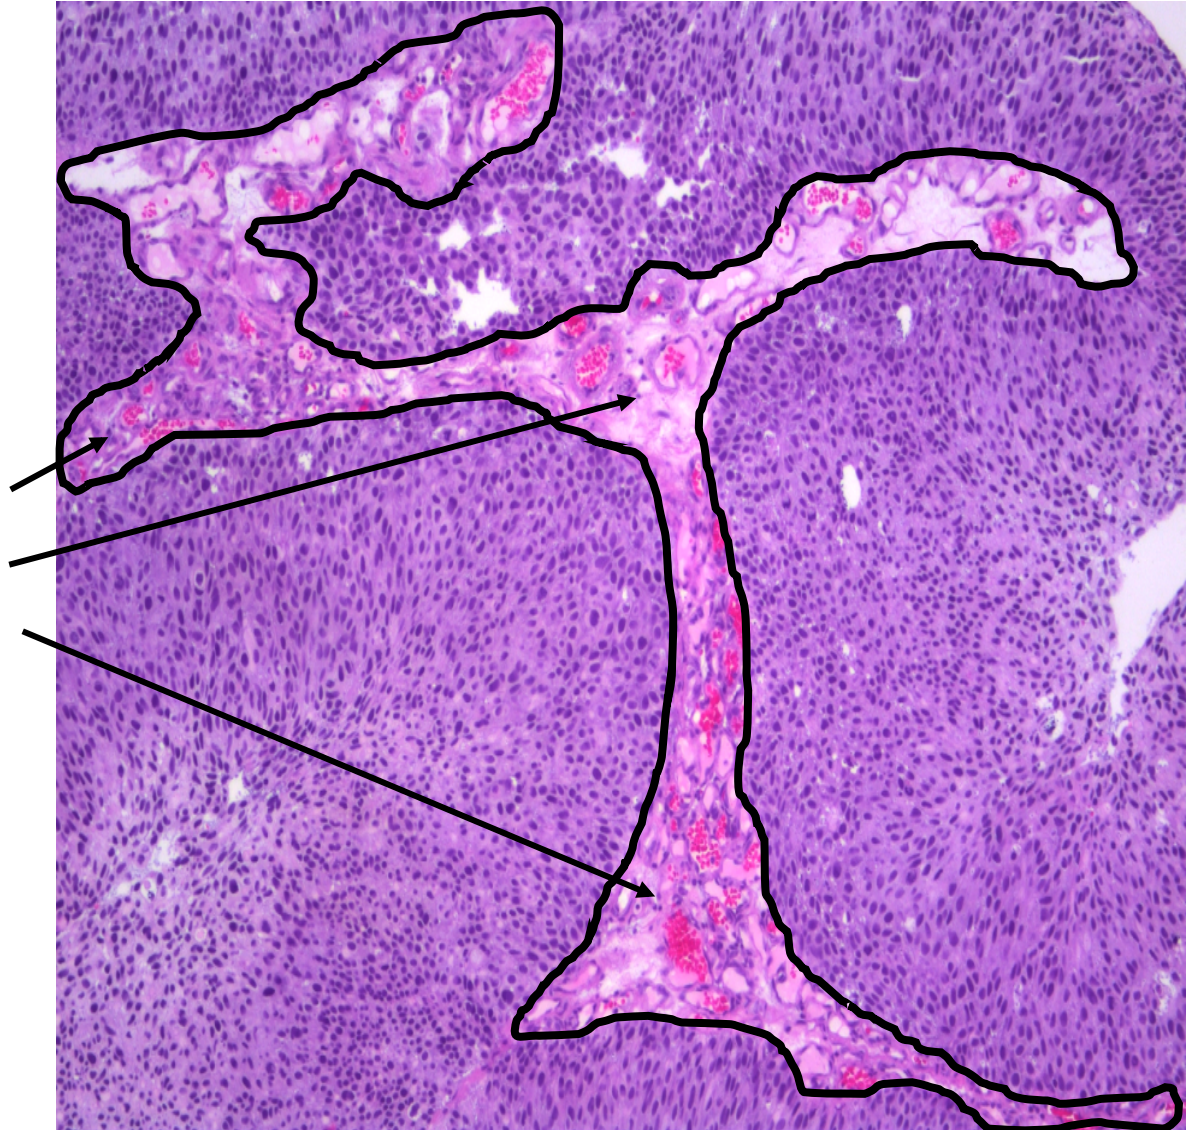

# Determine the localization of inflammatory infiltrate

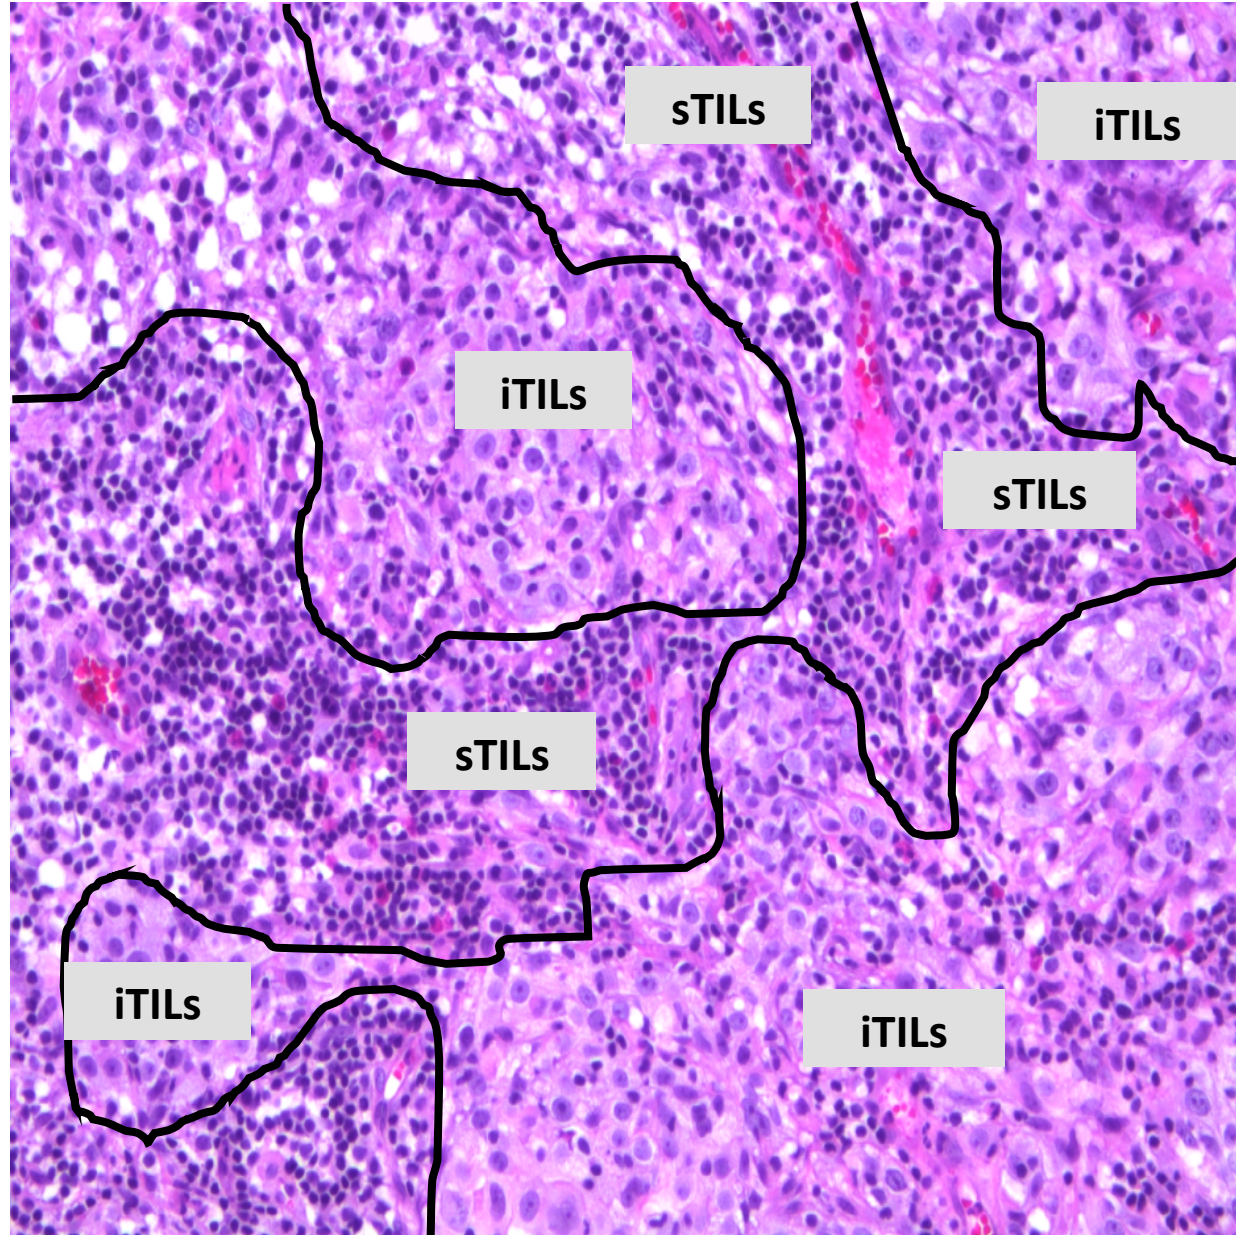

Intra-tumoral TILs (iTILs)

Stromal TILs (sTILs)

# Determine the localization of inflammatory infiltrate

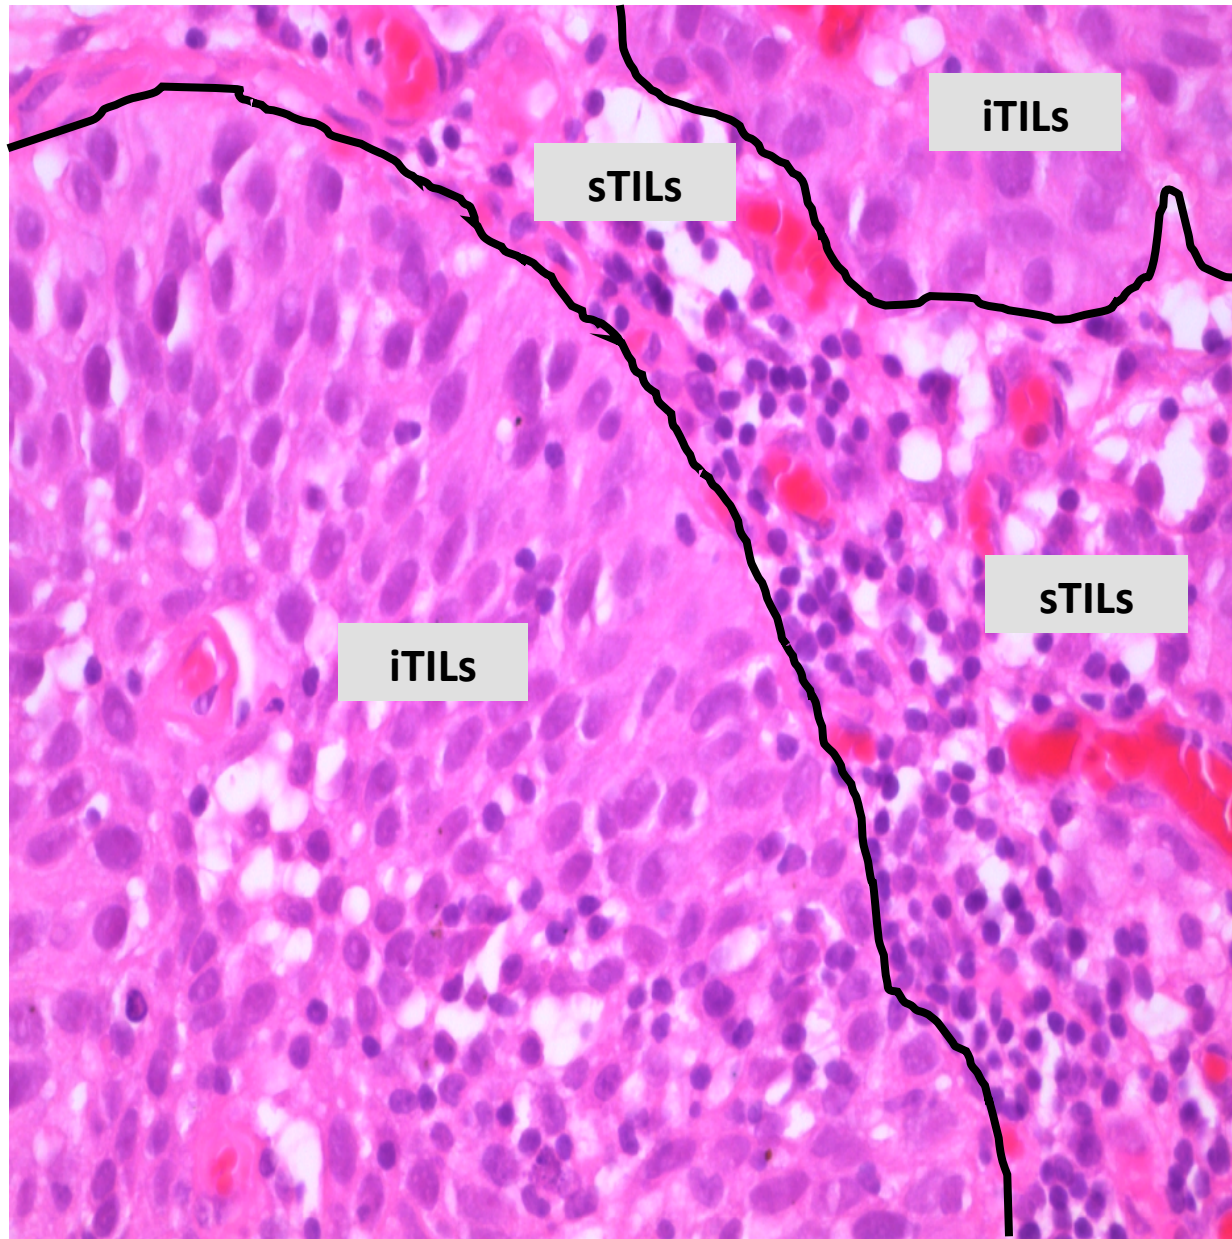

iTILs

sTILs

iTILs

sTILs

Intra-tumoral TILs (iTILs)

Stromal TILs (sTILs)

# Only mononuclear leukocytes should be scored

- Exclude polymorphonuclear leukocytes from the assessment of TILs
- In this case the frequent eosinophils should be excluded
- Include lymphocytes and plasma cells

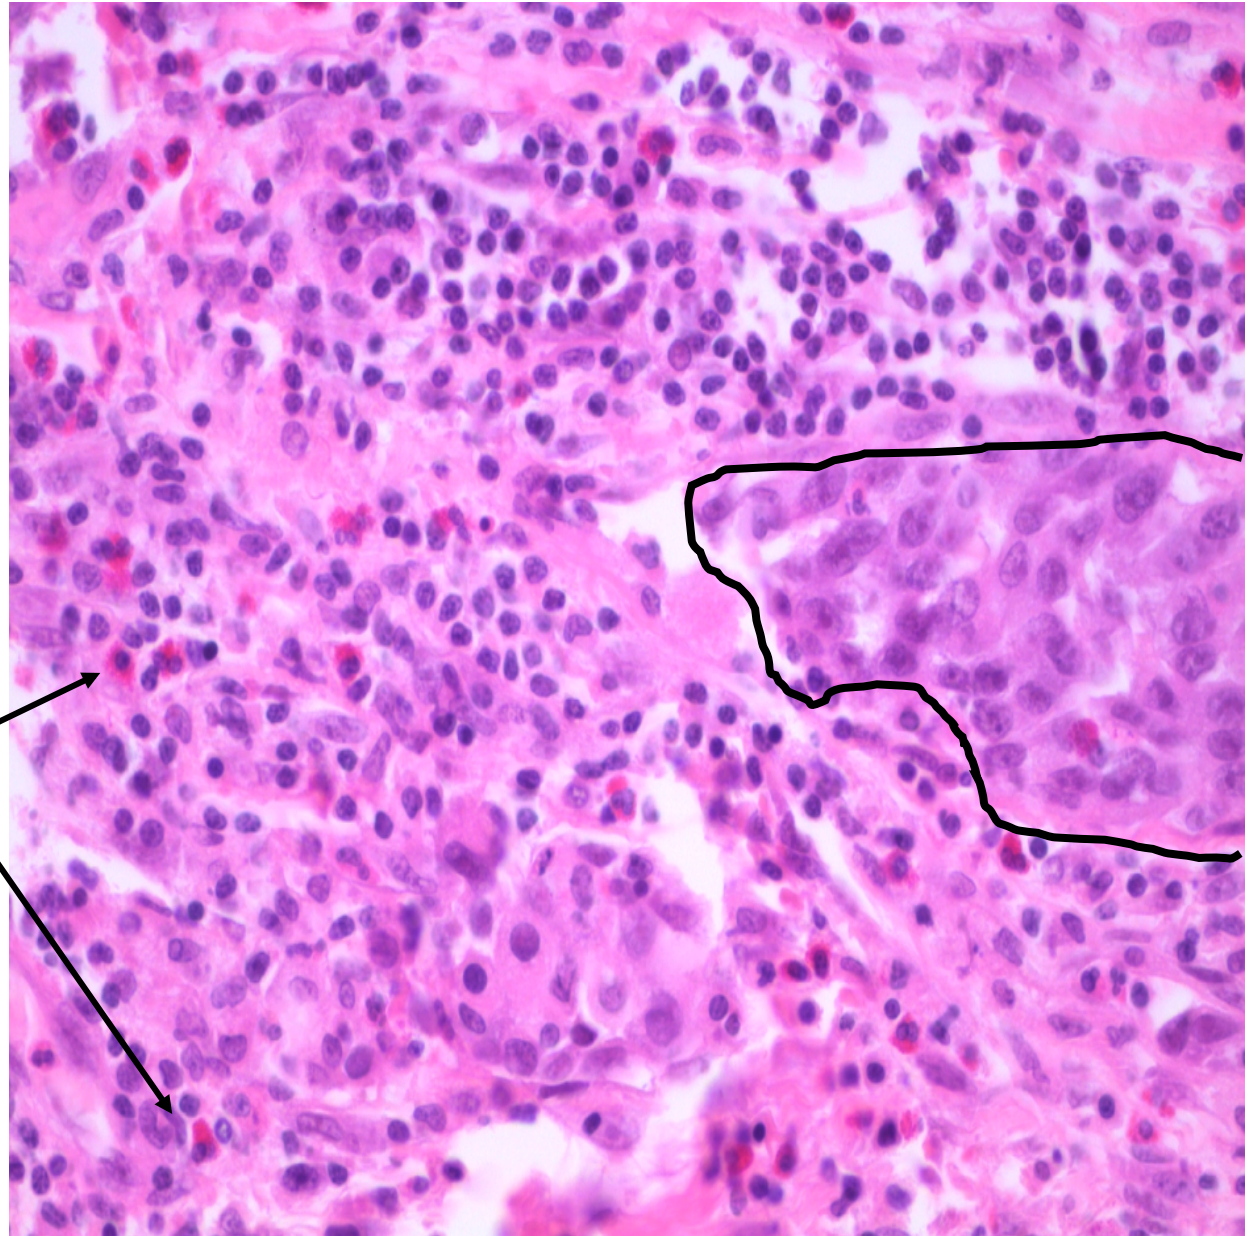



# Exclude TILs in tumor zones with necrosis

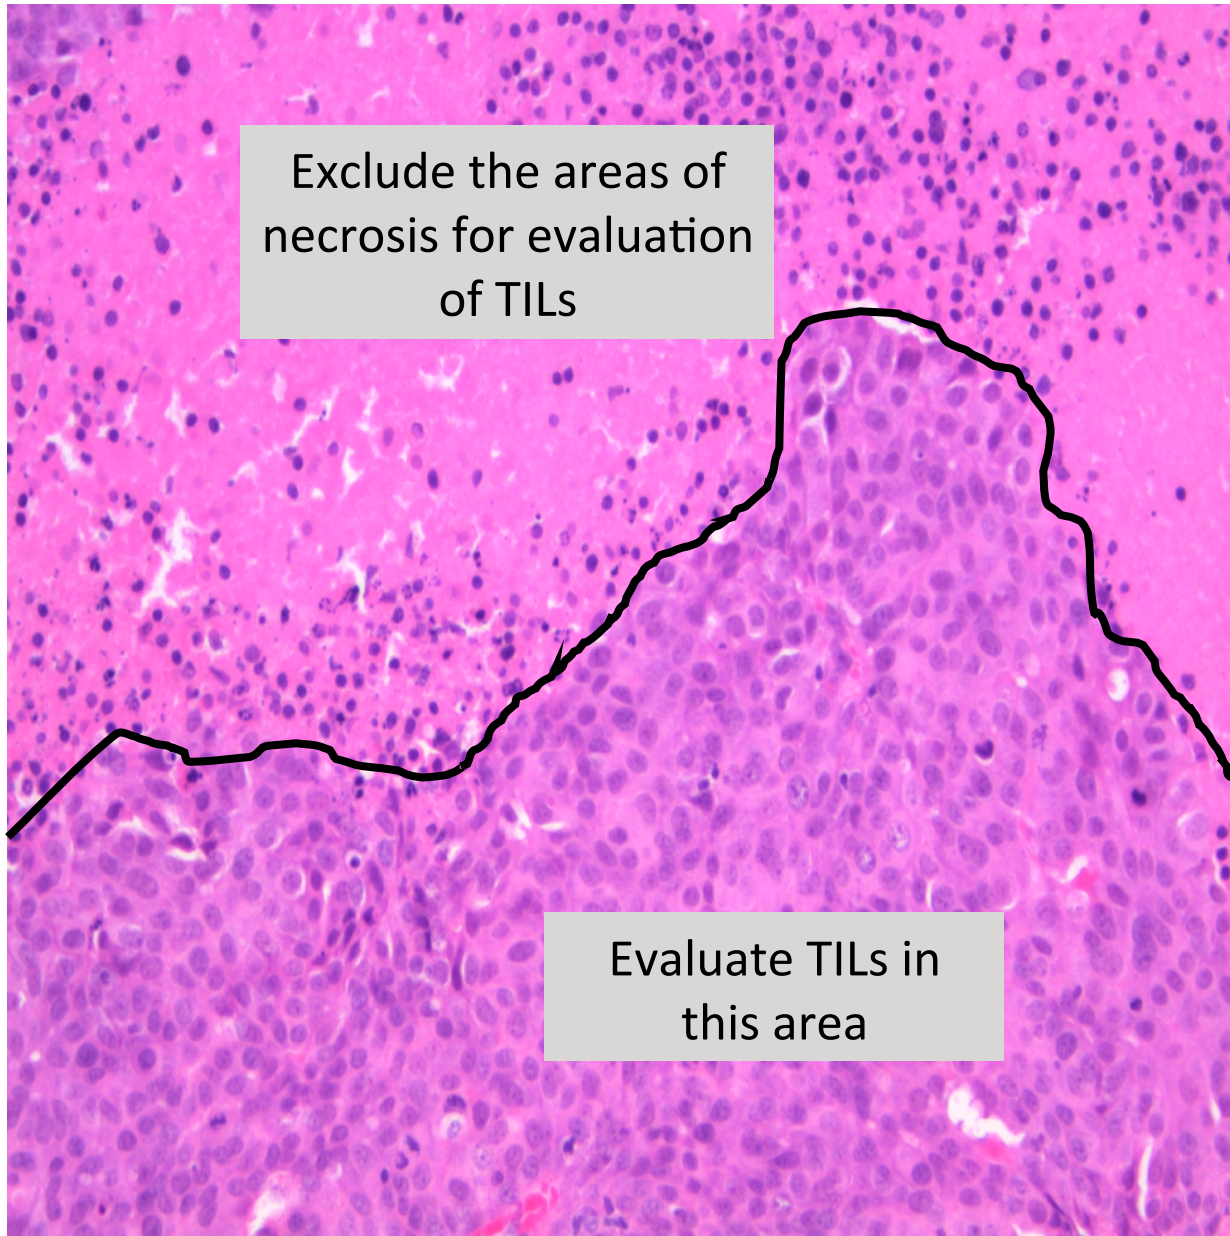

# Exclude TILs in areas with coagulation artefacts

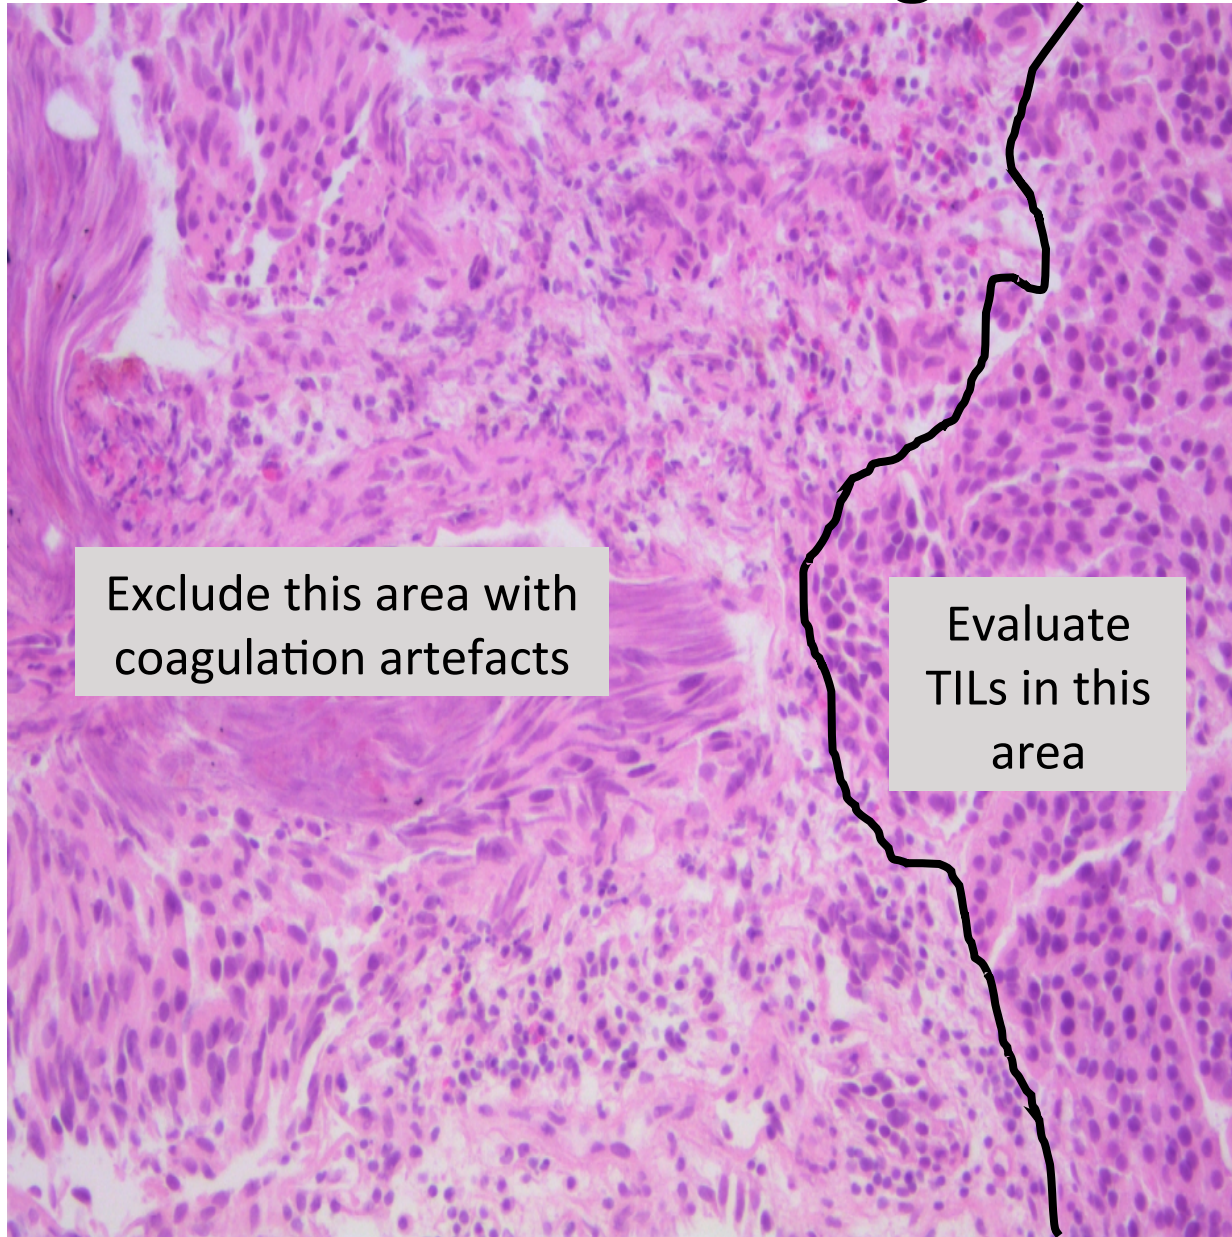

# Exclude TILs in previous biopsy sites

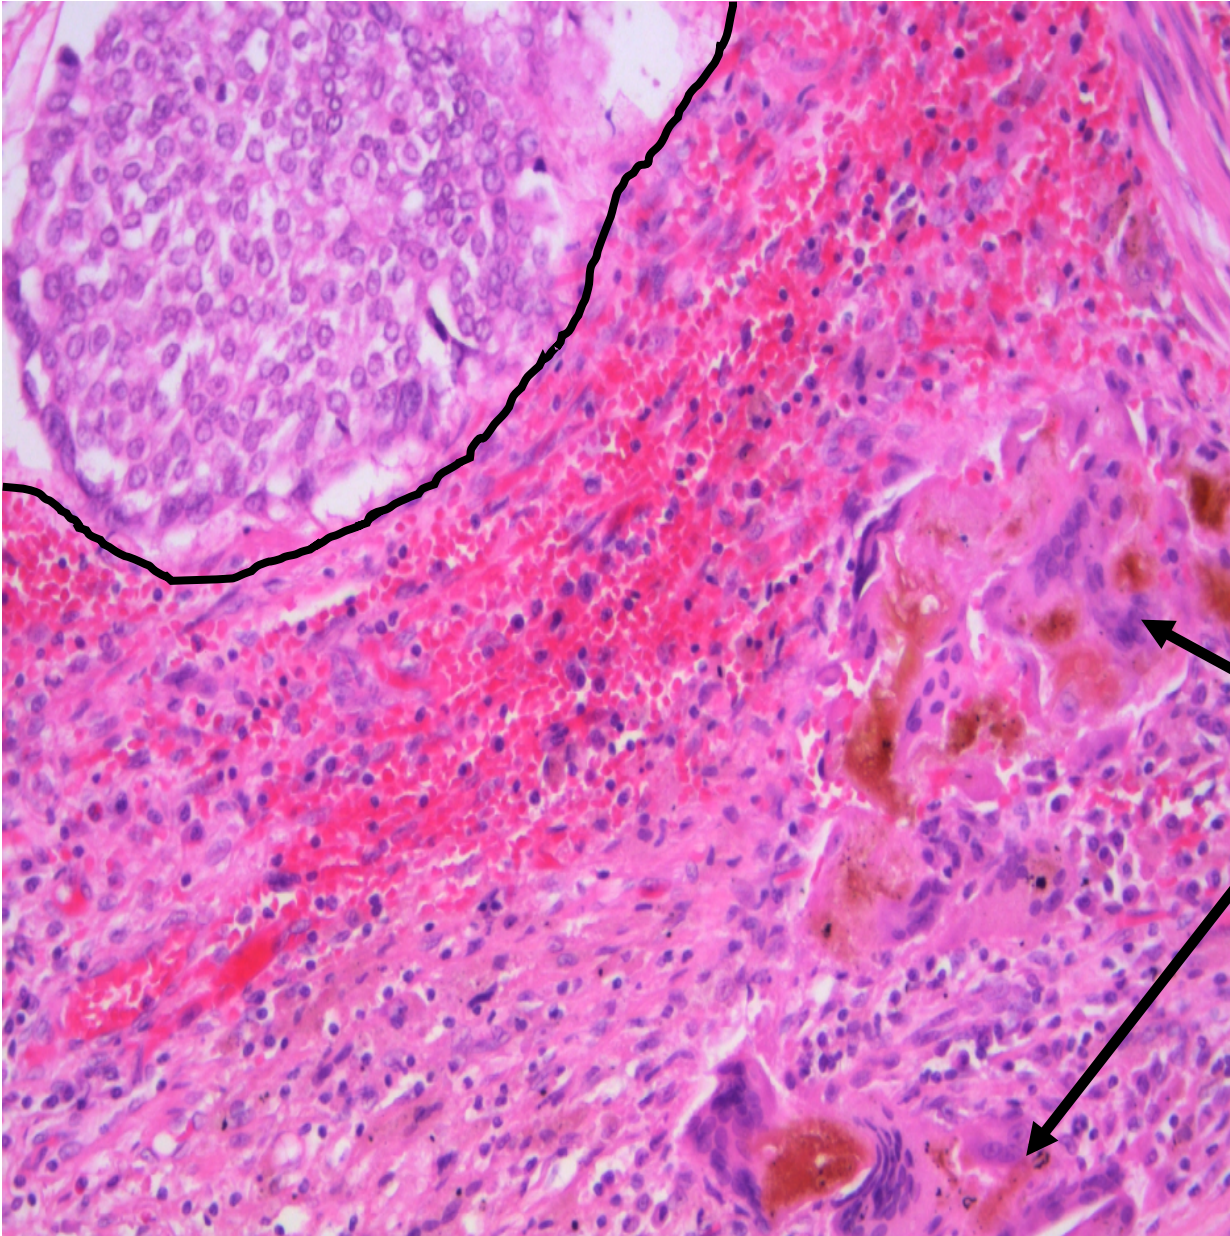

- Patients with UC often have a history of repetitive TURBT procedures
- In this case the areas with giant cell reaction after TURBT should be excluded from assessment of TILs
